# Supplementary material
Source: PubMed Central journal article supplement (PMC9710725)

**Supplementary Table 1.** List of channel-specific image acquisition settings for six human-derived cell lines.

| Cell Line | Organelle/Purpose                                               | Integration Time (ms) | Laser Power (%) | Focal Height ( $\mu\text{m}$ ) <sup>f</sup> |
|-----------|-----------------------------------------------------------------|-----------------------|-----------------|---------------------------------------------|
| A549      | DNA <sup>a</sup>                                                | 80                    | 55              | -4.4                                        |
|           | RNA (Nucleoli) <sup>b</sup>                                     | 60                    | 50              | -1.2                                        |
|           | ER (Endoplasmic reticulum) <sup>c</sup>                         | 40                    | 40              | -2.4                                        |
|           | AGP (Actin cytoskeleton + Golgi + Plasma membrane) <sup>d</sup> | 60                    | 60              | -4.4                                        |
|           | Mito <sup>e</sup>                                               | 20                    | 15              | -6.4                                        |
| ARPE-19   | DNA <sup>a</sup>                                                | 120                   | 60              | -4.8                                        |
|           | RNA (Nucleoli) <sup>b</sup>                                     | 20                    | 45              | -1.6                                        |
|           | ER (Endoplasmic reticulum) <sup>c</sup>                         | 40                    | 40              | -4.0                                        |
|           | AGP (Actin cytoskeleton + Golgi + Plasma membrane) <sup>d</sup> | 100                   | 40              | -4.8                                        |
|           | Mito <sup>e</sup>                                               | 120                   | 80              | -6.8                                        |
| HepG2     | DNA <sup>a</sup>                                                | 100                   | 80              | -2.0                                        |
|           | RNA (Nucleoli) <sup>b</sup>                                     | 40                    | 30              | -1.6                                        |
|           | ER (Endoplasmic reticulum) <sup>c</sup>                         | 20                    | 35              | -2.4                                        |
|           | AGP (Actin cytoskeleton + Golgi + Plasma membrane) <sup>d</sup> | 80                    | 60              | -2.4                                        |
|           | Mito <sup>e</sup>                                               | 80                    | 60              | -2.4                                        |
| HTB-9     | DNA <sup>a</sup>                                                | 100                   | 60              | -4.4                                        |
|           | RNA (Nucleoli) <sup>b</sup>                                     | 80                    | 60              | -2.8                                        |
|           | ER (Endoplasmic reticulum) <sup>c</sup>                         | 120                   | 70              | -4.4                                        |
|           | AGP (Actin cytoskeleton + Golgi + Plasma membrane) <sup>d</sup> | 80                    | 60              | -4.4                                        |
|           | Mito <sup>e</sup>                                               | 20                    | 40              | -6.8                                        |
| MCF7      | DNA <sup>a</sup>                                                | 80                    | 40              | -3.2                                        |
|           | RNA (Nucleoli) <sup>b</sup>                                     | 40                    | 30              | -1.6                                        |
|           | ER (Endoplasmic reticulum) <sup>c</sup>                         | 80                    | 35              | -3.2                                        |
|           | AGP (Actin cytoskeleton + Golgi + Plasma membrane) <sup>d</sup> | 60                    | 40              | -4.8                                        |
|           | Mito <sup>e</sup>                                               | 20                    | 65              | -6.4                                        |
| U-2 OS    | DNA <sup>a</sup>                                                | 80                    | 50              | -3.6                                        |
|           | RNA (Nucleoli) <sup>b</sup>                                     | 20                    | 45              | -0.4                                        |
|           | ER (Endoplasmic reticulum) <sup>c</sup>                         | 20                    | 50              | -3.6                                        |
|           | AGP (Actin cytoskeleton + Golgi + Plasma membrane) <sup>d</sup> | 120                   | 50              | -4.4                                        |
|           | Mito <sup>e</sup>                                               | 20                    | 80              | -6.8                                        |

<sup>a</sup> Visualized with Hoechst-33342. Imaged using 405 nm laser with 435-480 nm emission filter. <sup>b</sup> Visualized with SYTO-14. Imaged using 488 nm laser with 500-550 nm emission filter. <sup>c</sup> Visualized with Alexa Fluor 488-conjugated concanavalin-A. Imaged using 488 nm laser with 500-550 nm emission filter. <sup>d</sup> Visualized with Alexa Fluor 568-conjugated phalloidin multiplexed with Alexa Fluor 555-conjugated wheat germ agglutinin. Imaged using 561 nm laser with 570-630 nm emission filter. <sup>e</sup> Visualized with Mitotracker Deep Red. Imaged with 640 nm laser with 650-760 nm emission filter. <sup>f</sup> focal height in reference to default values determined by the Opera Phenix HCS imaging system when using PerkinElmer CellCarrier-384 Ultra microplates.

# Supplementary Figure 1

Qualitative comparison of chemical-induced morphological phenotypes  
across cell lines

- Supplementary Figure 1A. Ca-074-Me
- Supplementary Figure 1B. Etoposide

# Supplementary Figure 1A.

## Ca-074-Me

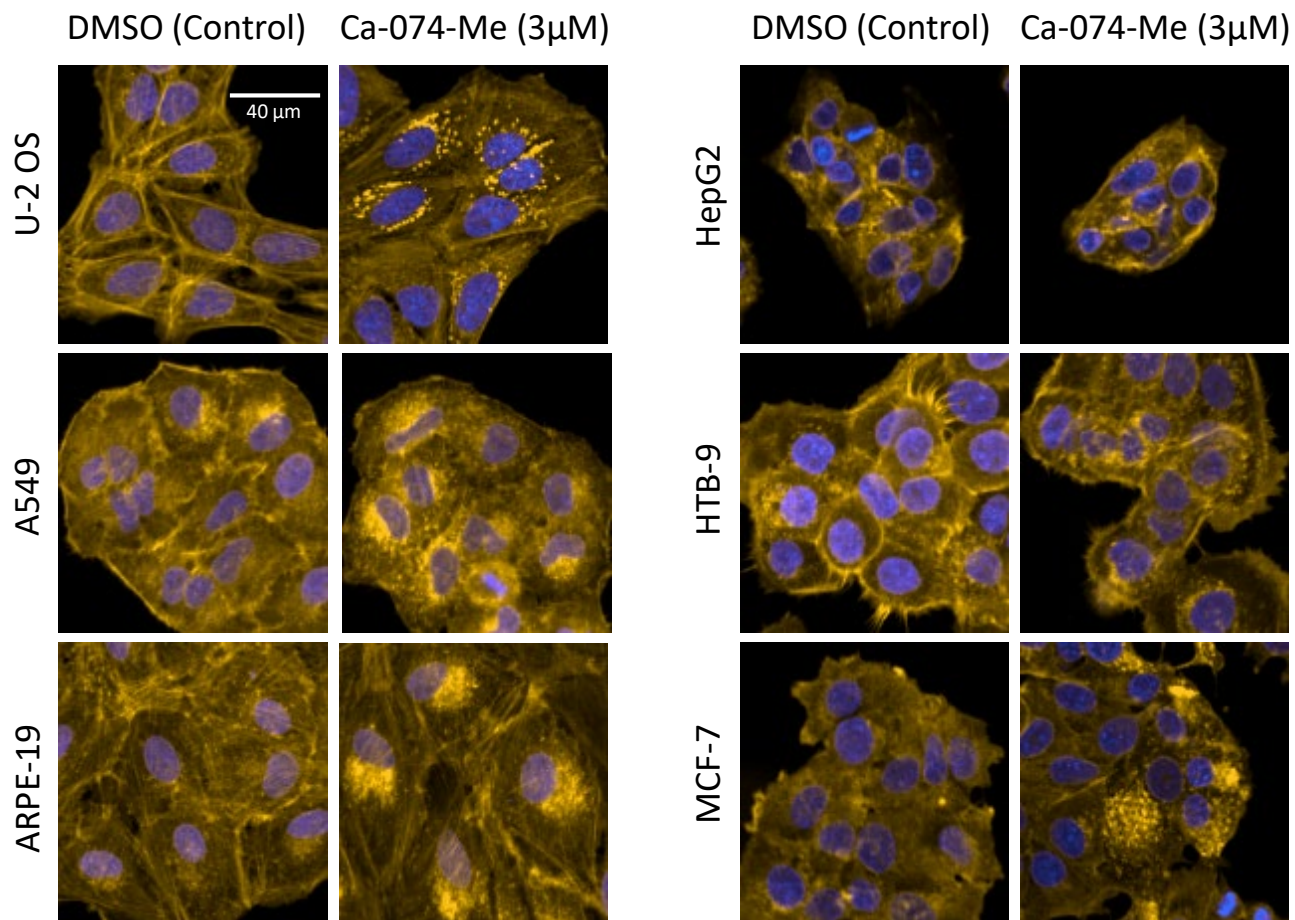

# Supplementary Figure 1B.

## Etoposide

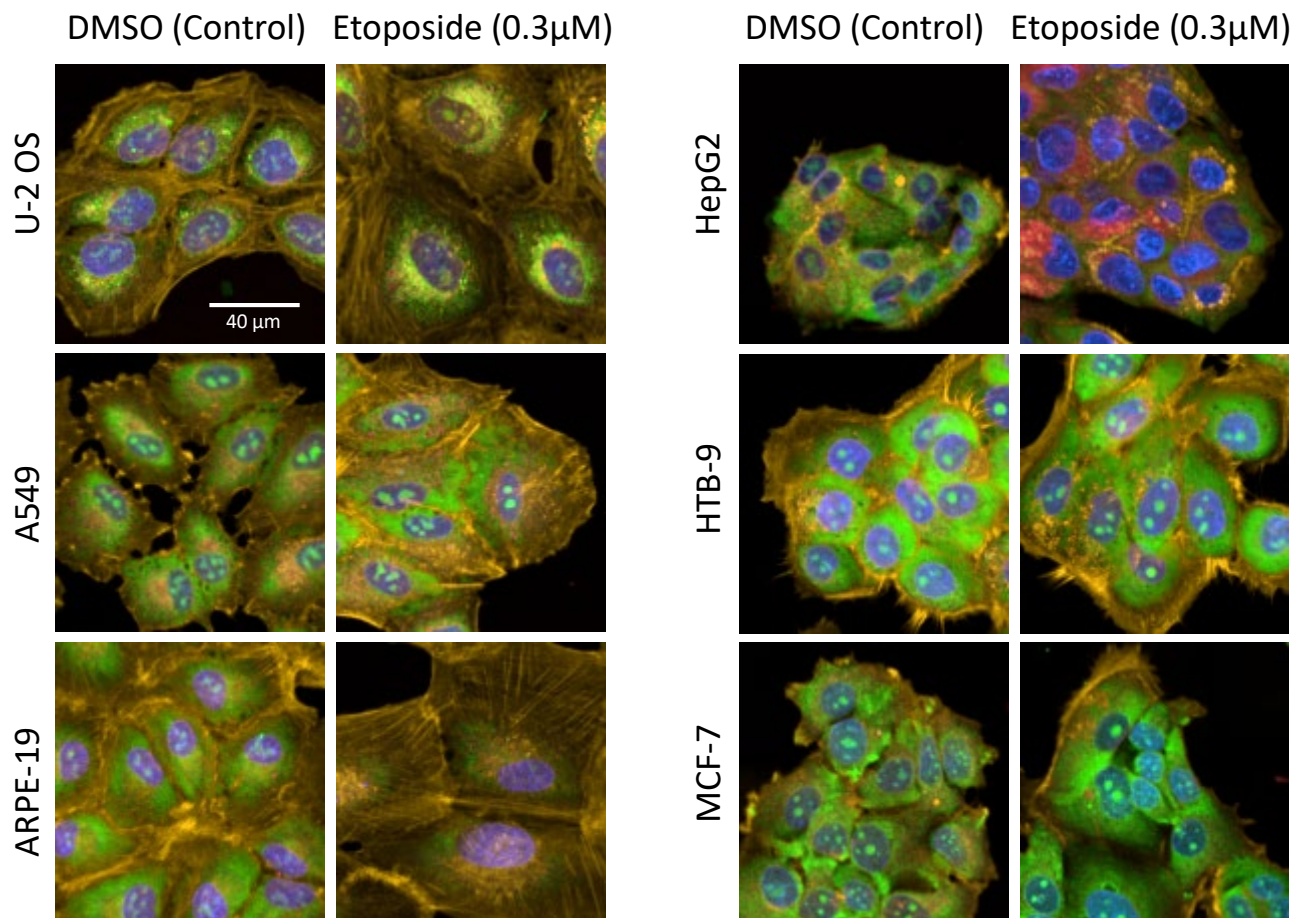

# Supplementary Figure 2

## Potency Magnitude Plots and Accumulation Plots for Visualizing Phenotypic Effects of Test Chemicals

- Supplementary Figure 2A. Sorbitol
- Supplementary Figure 2B. Saccharin
- Supplementary Figure 2C. Amperozide
- Supplementary Figure 2D. Fluphenazine
- Supplementary Figure 2E. Tetrandrine
- Supplementary Figure 2F. Ca-074-Me
- Supplementary Figure 2G. Metoclopramide
- Supplementary Figure 2H. NPPD
- Supplementary Figure 2I. Fenbendazole
- Supplementary Figure 2J. Oxibendazole
- Supplementary Figure 2K. Taxol
- Supplementary Figure 2L. Rotenone
- Supplementary Figure 2M. Latrunculin B
- Supplementary Figure 2N. Etoposide
- Supplementary Figure 2O. Rapamycin

# Supplementary Figure 2A.

## Sorbititol

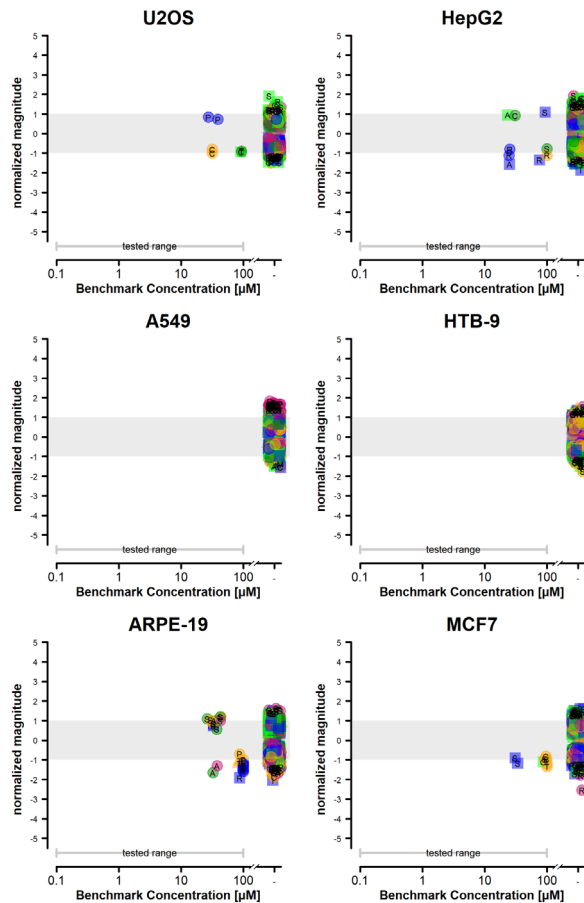

- Shape / Position
- DNA
- RNA
- ER
- AGP
- Mito
- I Intensity
- T Texture
- M Morphology
- S Symmetry
- C Compactness
- A Axial
- R Radial
- P Profile
- Cell / Cytoplasm
- Nuclei
- ◆ Ring
- ▲ Membrane

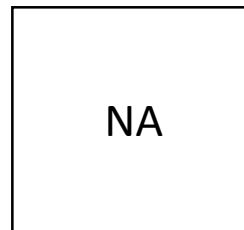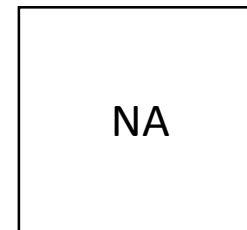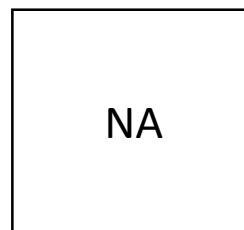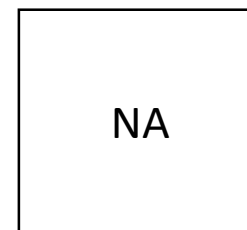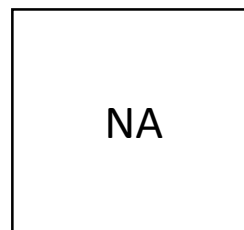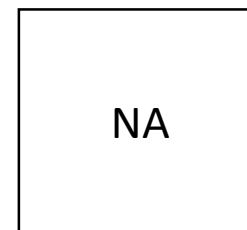

- Shape / Position
- DNA
- RNA
- ER
- AGP
- Mito
- I Intensity
- T Texture
- M Morphology
- S Symmetry
- C Compactness
- A Axial
- R Radial
- P Profile
- Cell / Cytoplasm
- Nuclei
- ◆ Ring
- ▲ Membrane

# Supplementary Figure 2B.

## Saccharin

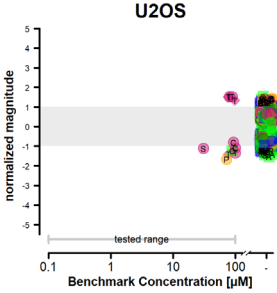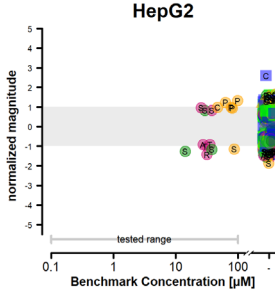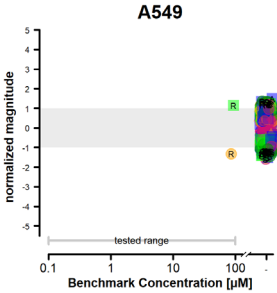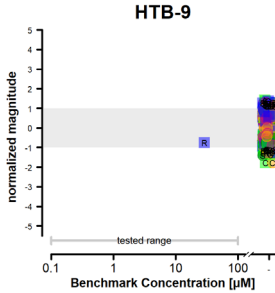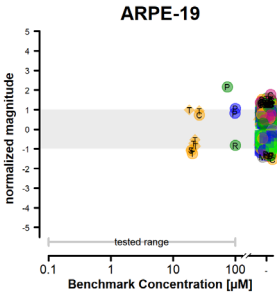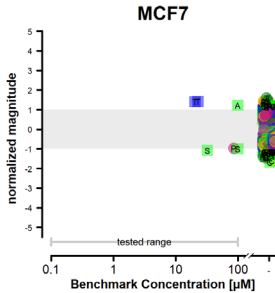

- Shape / Position
- DNA
- RNA
- ER
- AGP
- Mito
- I Intensity
- T Texture
- M Morphology
- S Symmetry
- C Compactness
- A Axial
- R Radial
- P Profile
- Cell / Cytoplasm
- Nuclei
- ◆ Ring
- ▲ Membrane

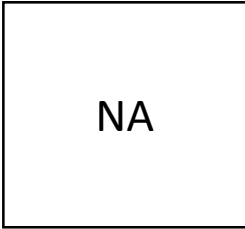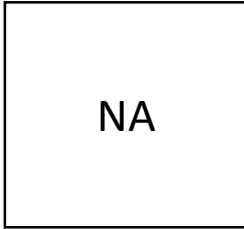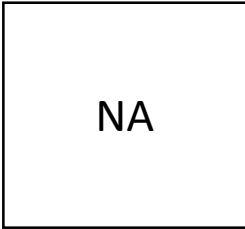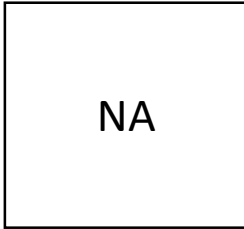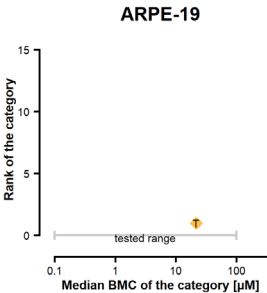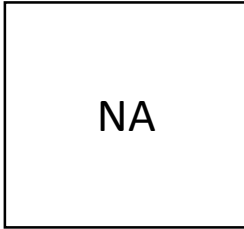

- Shape / Position
- DNA
- RNA
- ER
- AGP
- Mito
- I Intensity
- T Texture
- M Morphology
- S Symmetry
- C Compactness
- A Axial
- R Radial
- P Profile
- Cell / Cytoplasm
- Nuclei
- ◆ Ring
- ▲ Membrane

# Supplementary Figure 2C.

## Amperozide

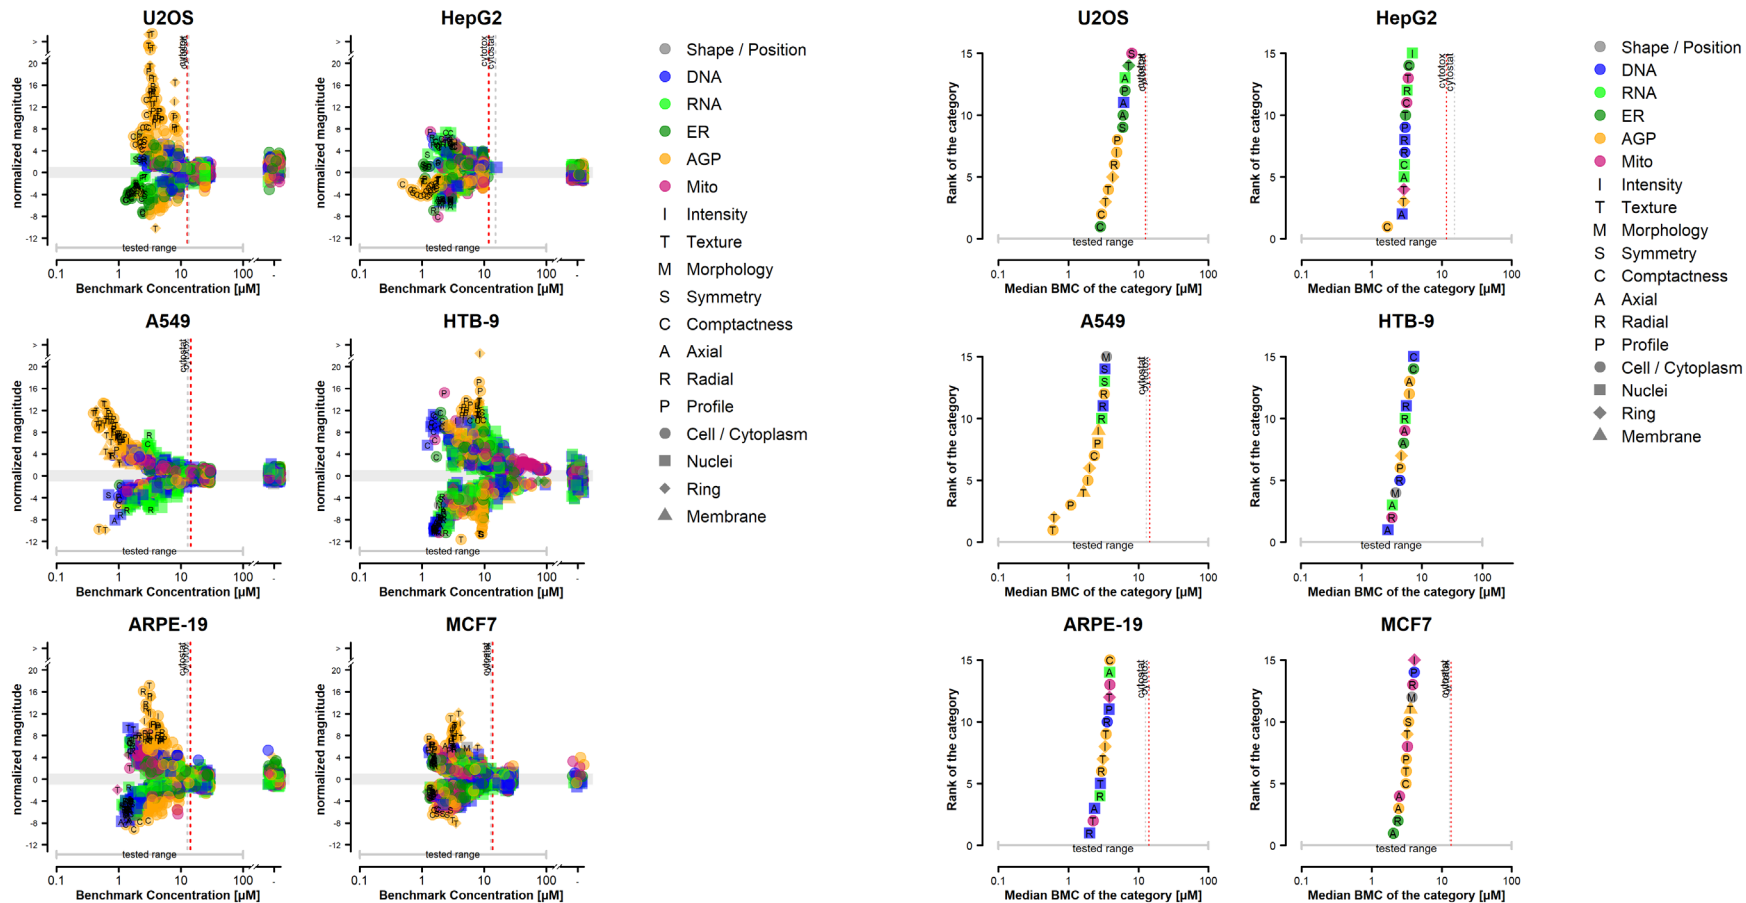



# Supplementary Figure 2D.

## Fluphenazine

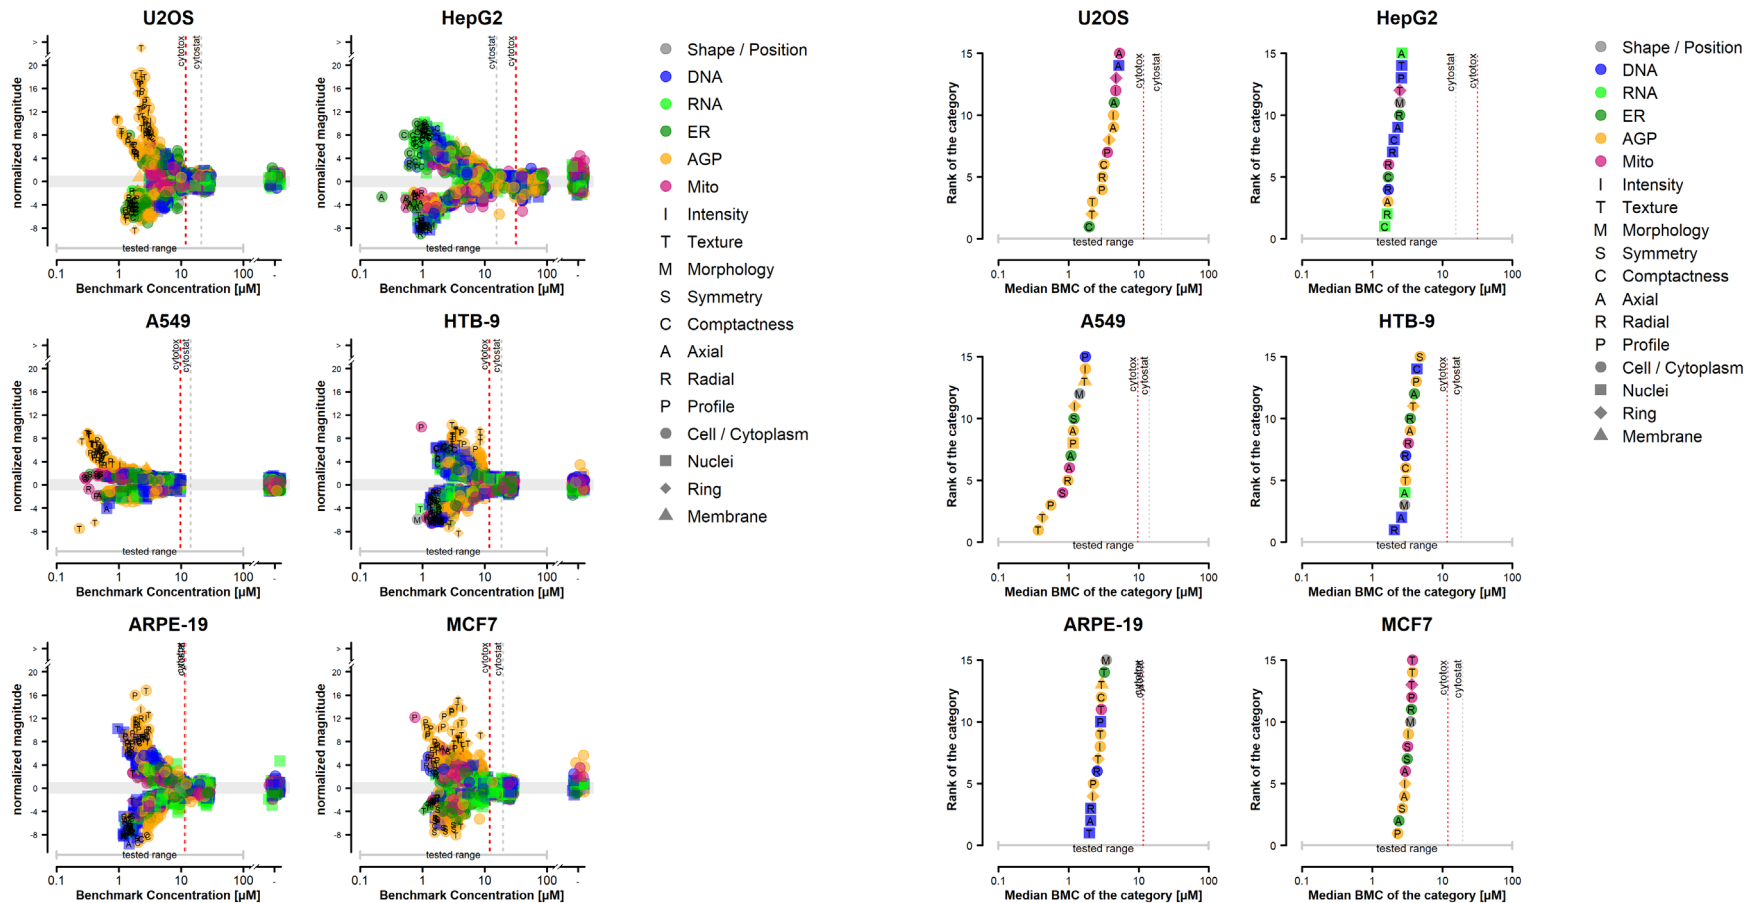

# Supplementary Figure 2E.

## Tetrandrine

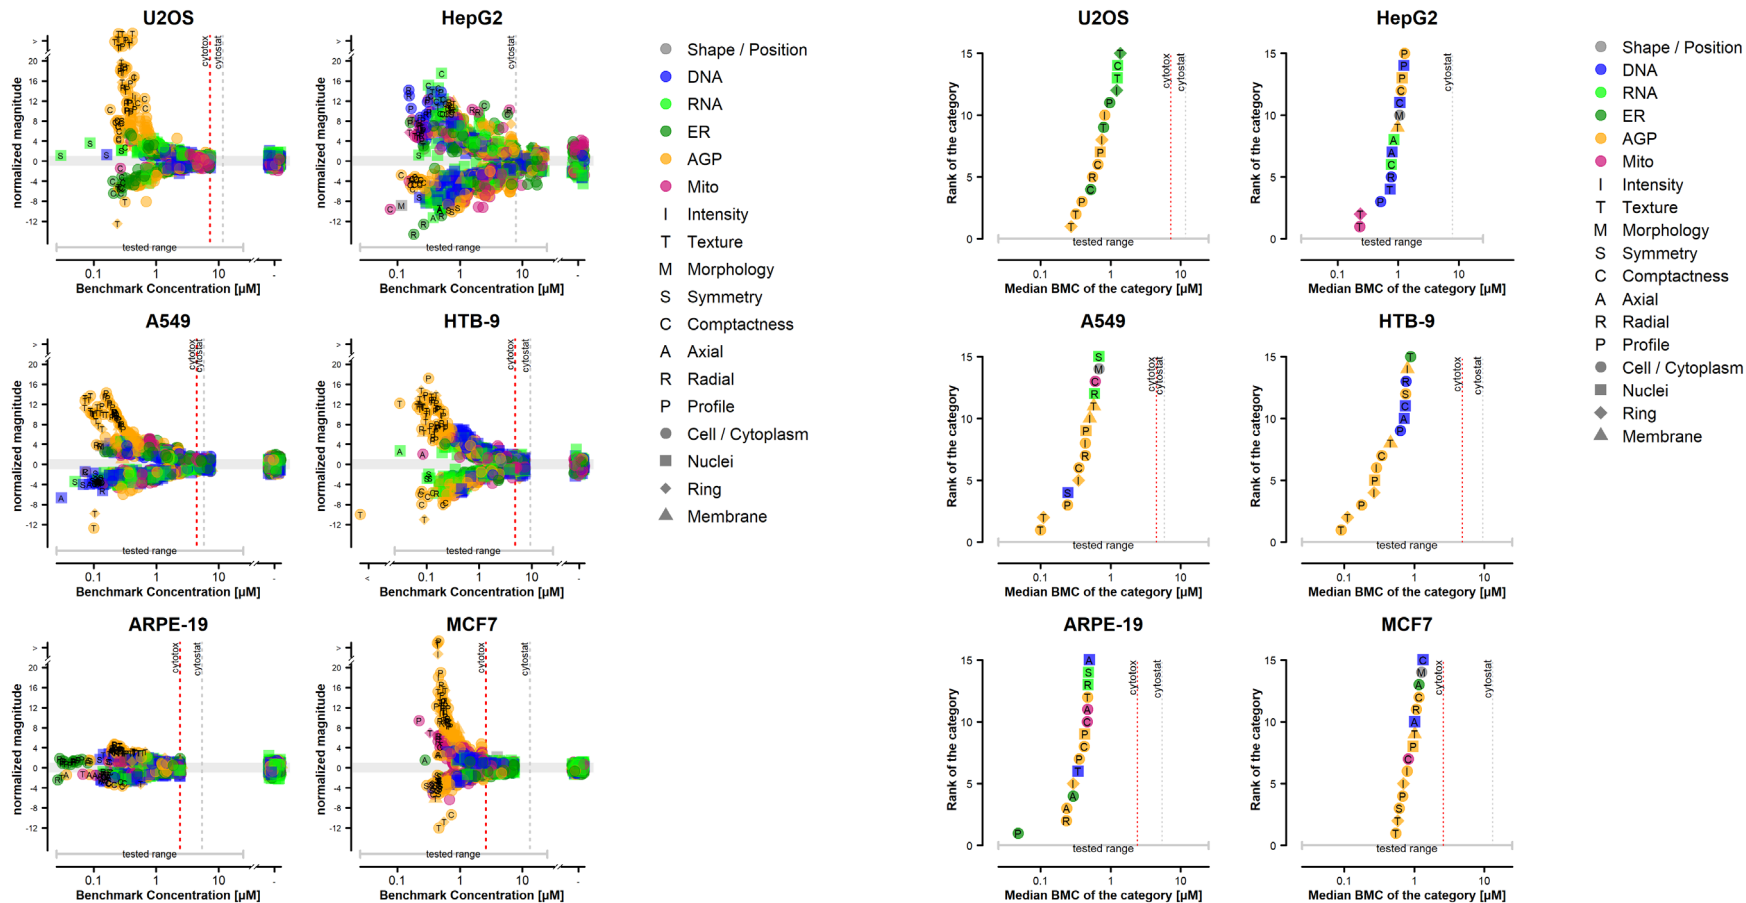

# Supplementary Figure 2F.

## Ca-074-Me

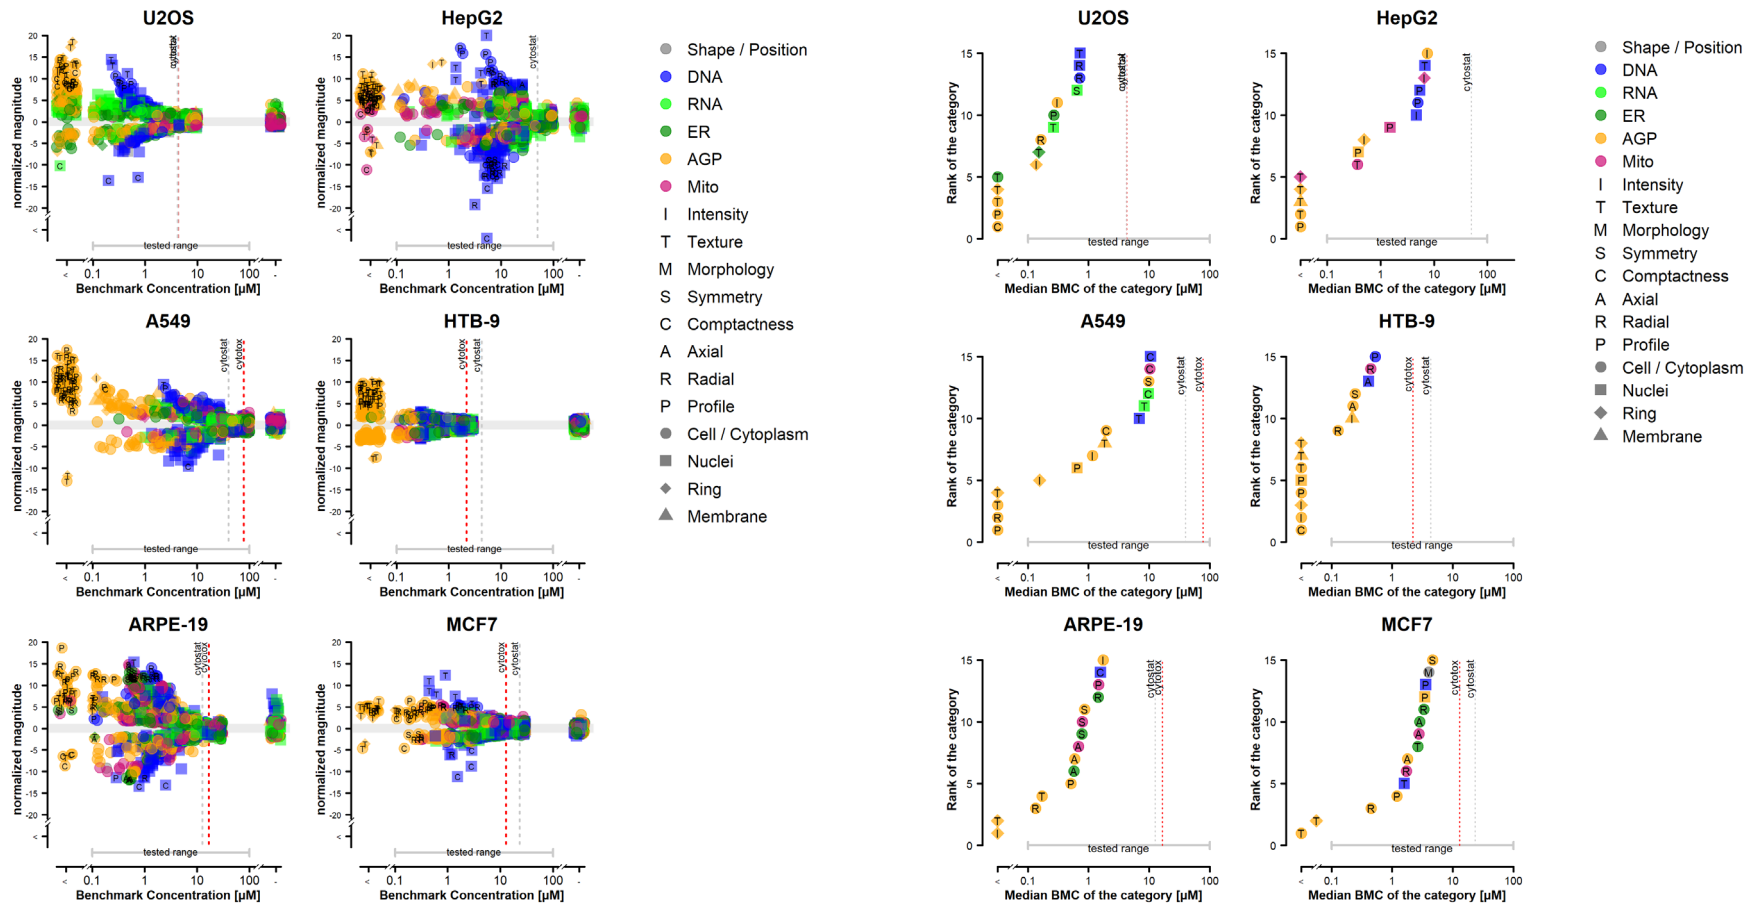

# Supplementary Figure 2G.

## Metoclopramide

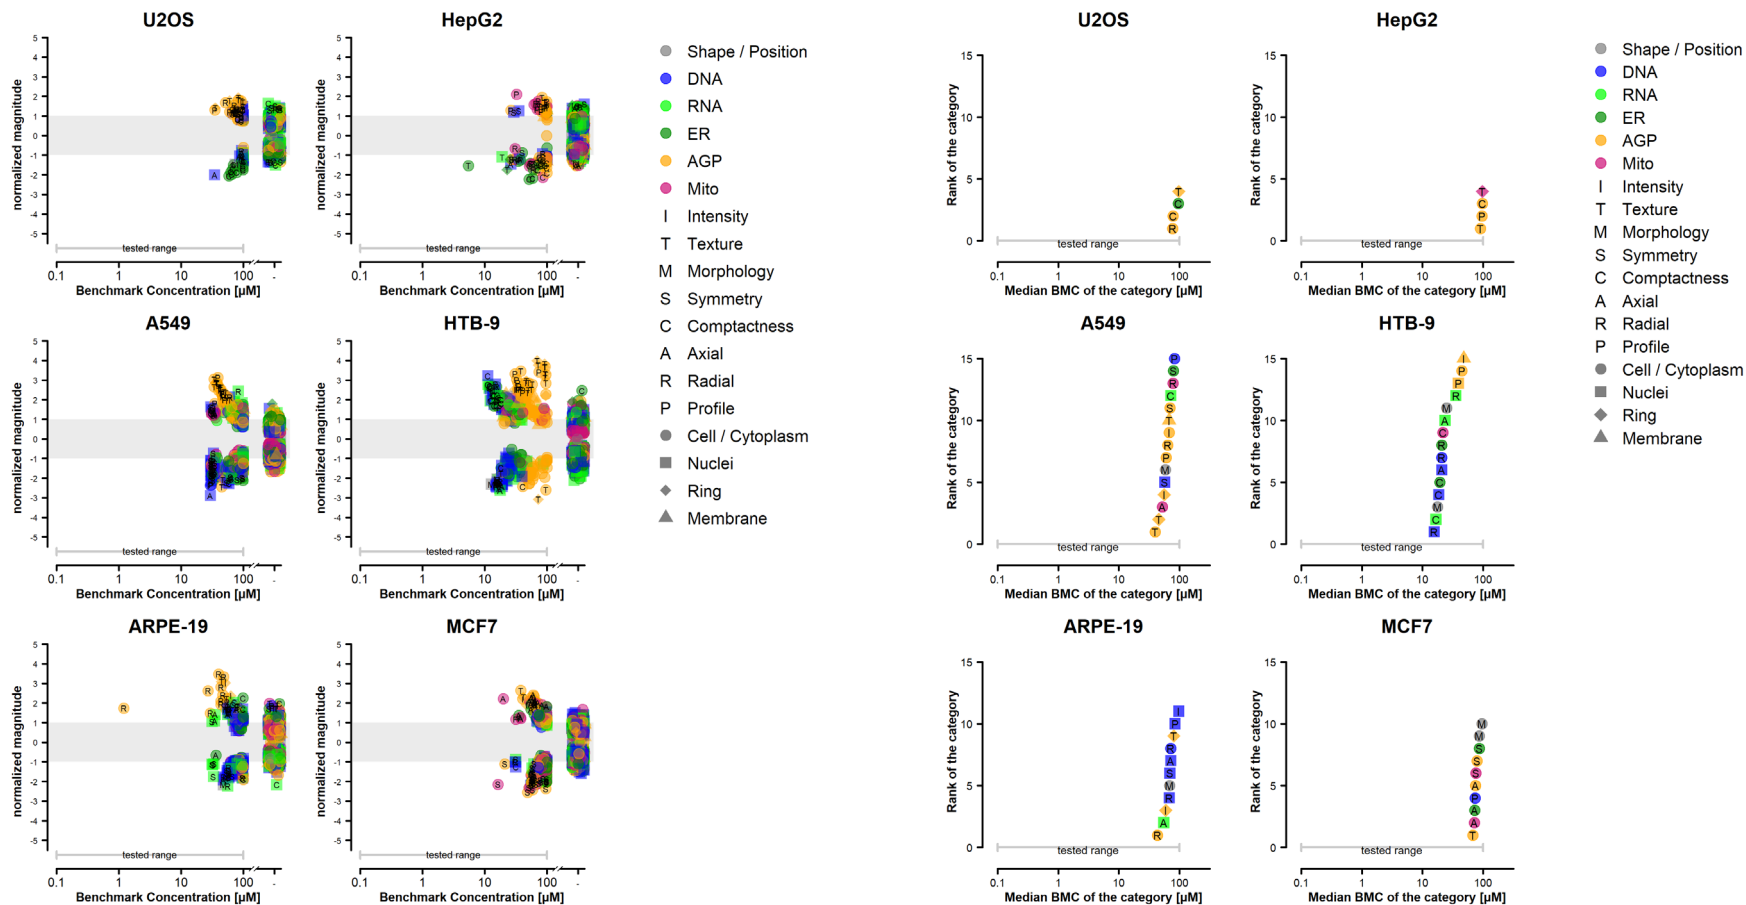

# Supplementary Figure 2H.

## NPPD

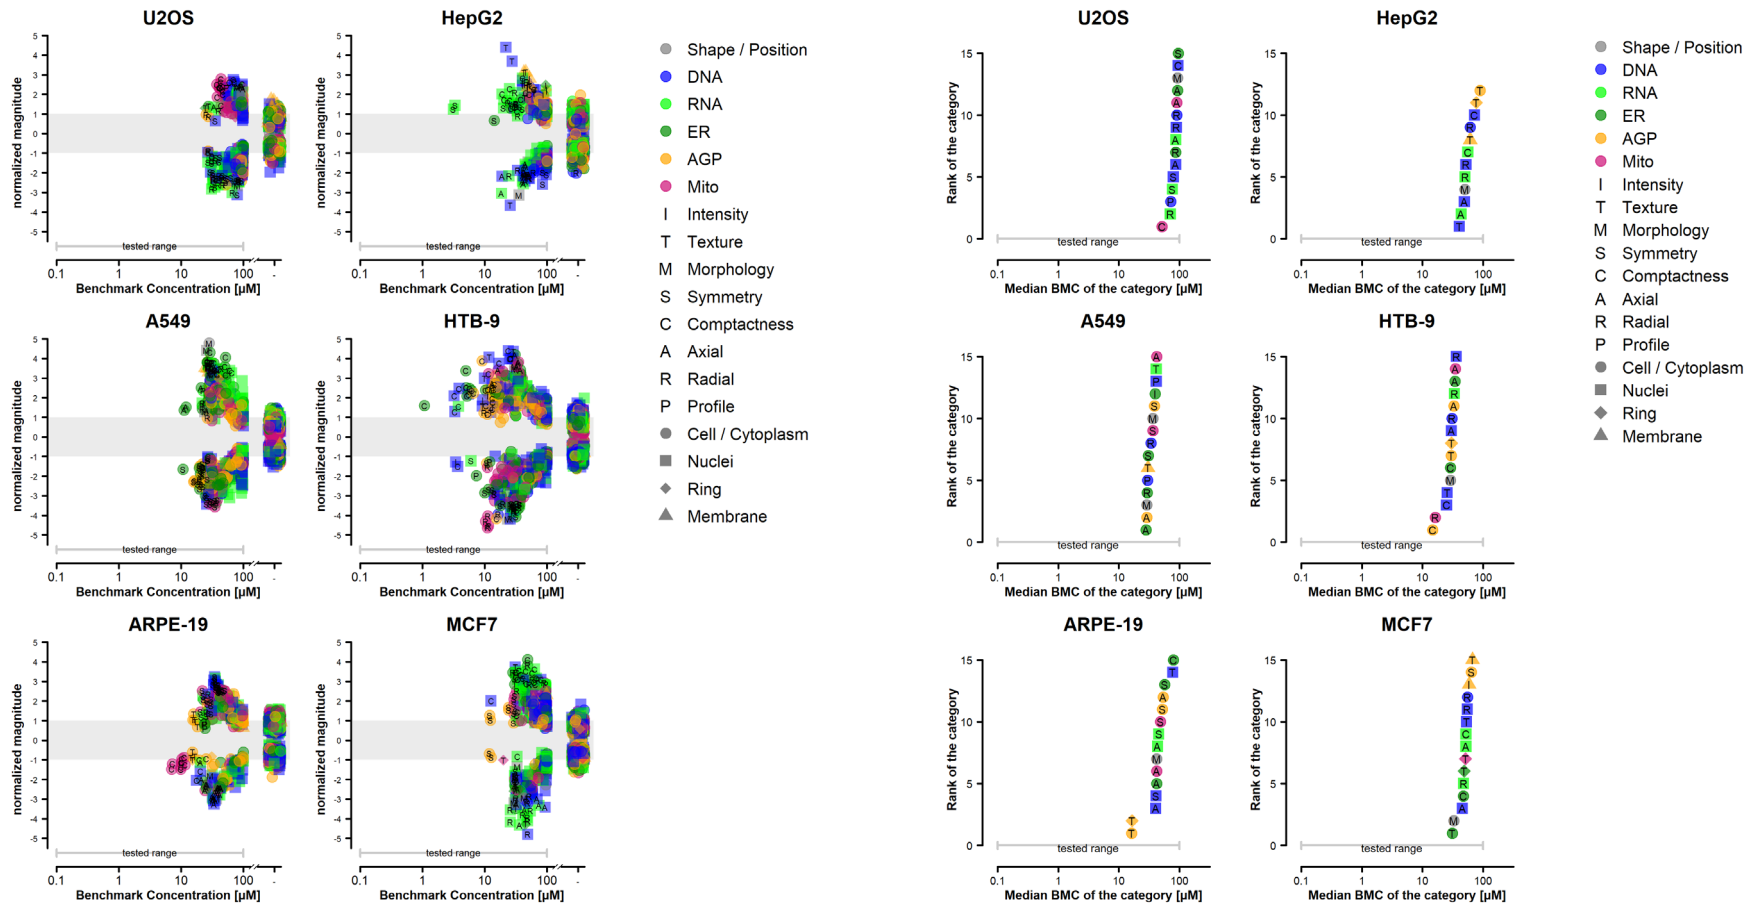

# Supplementary Figure 21. Fenbendazole

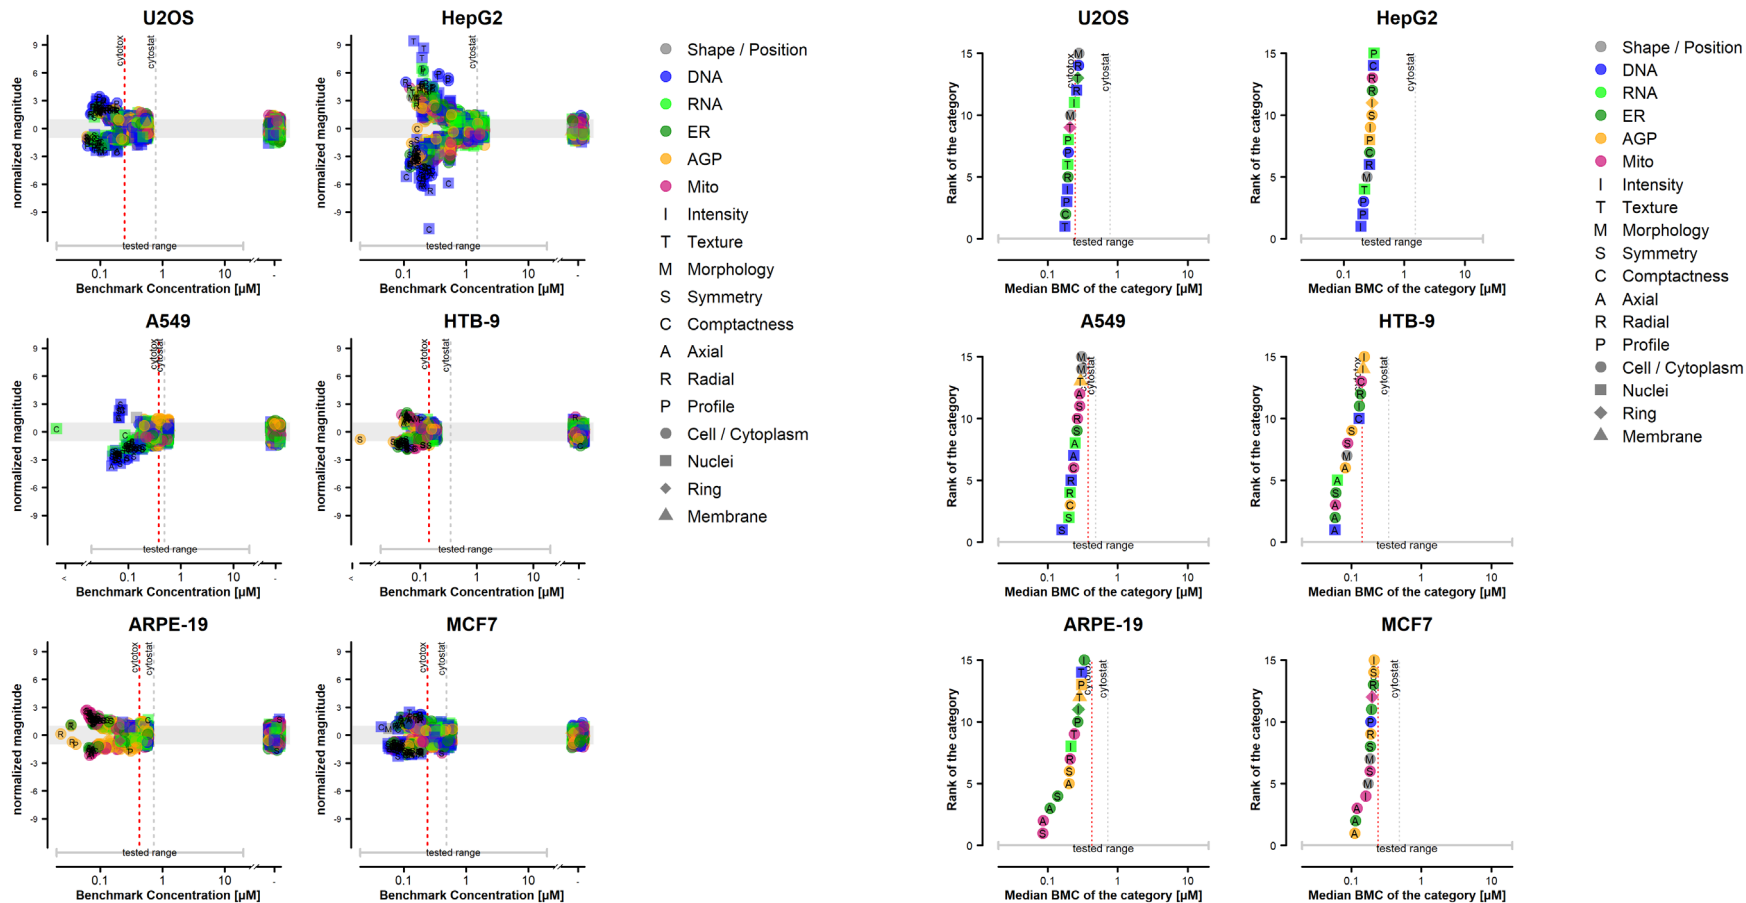

# Supplementary Figure 2J.

## Oxibendazole

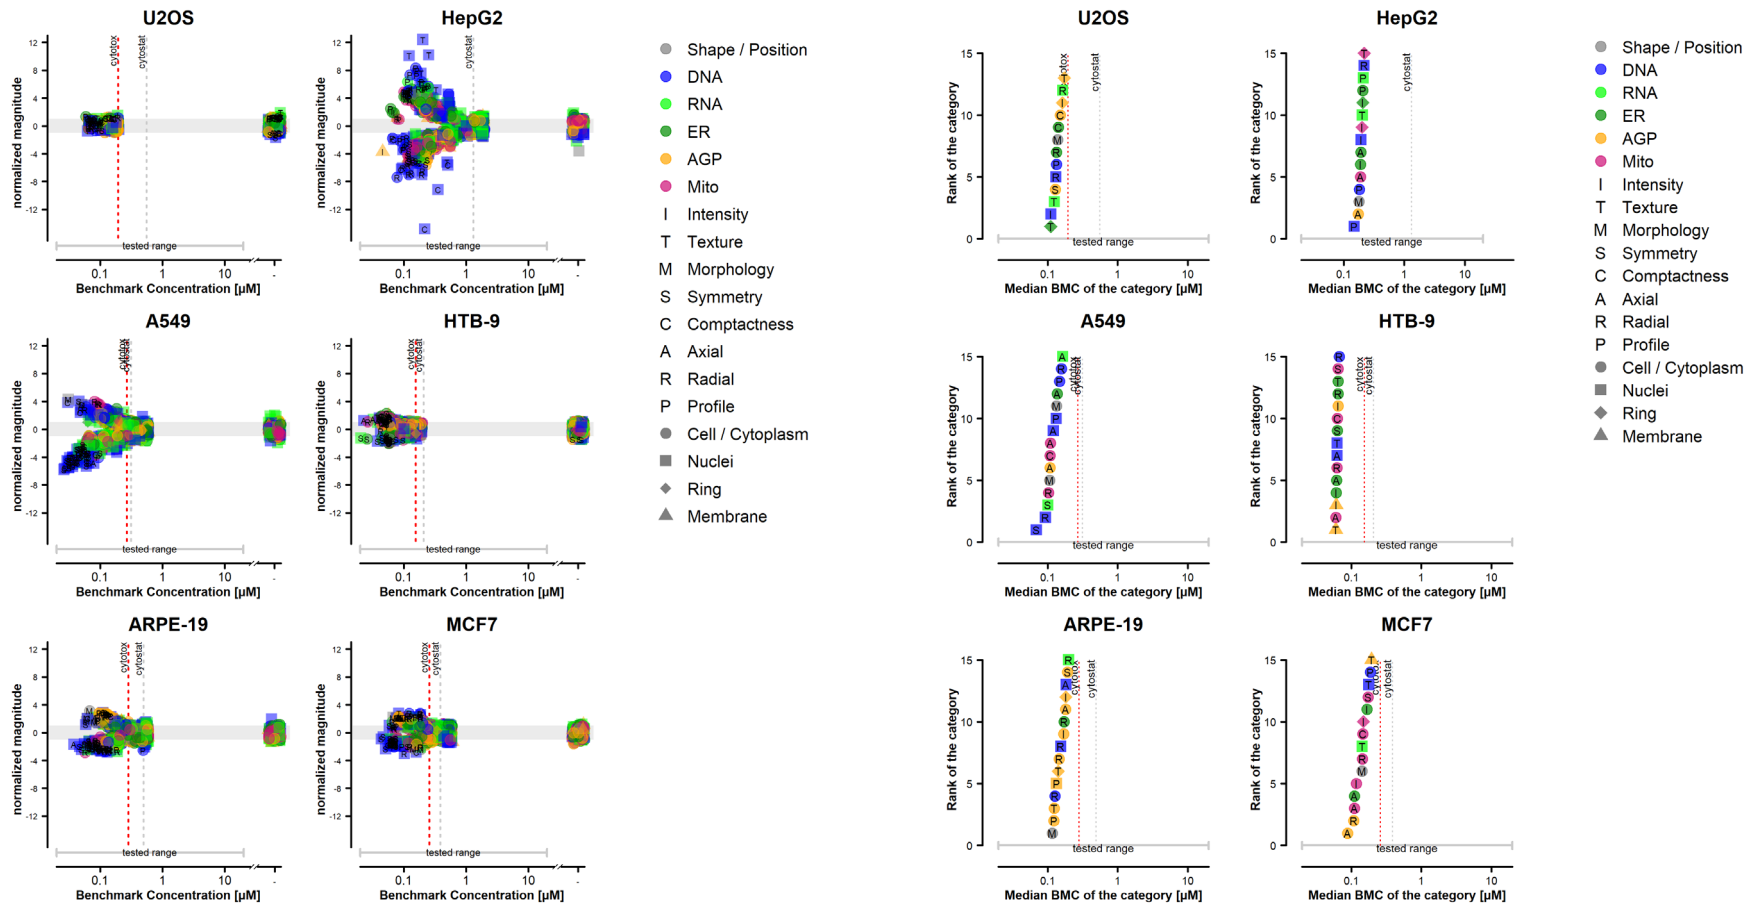

# Supplementary Figure 2K.

## Taxol

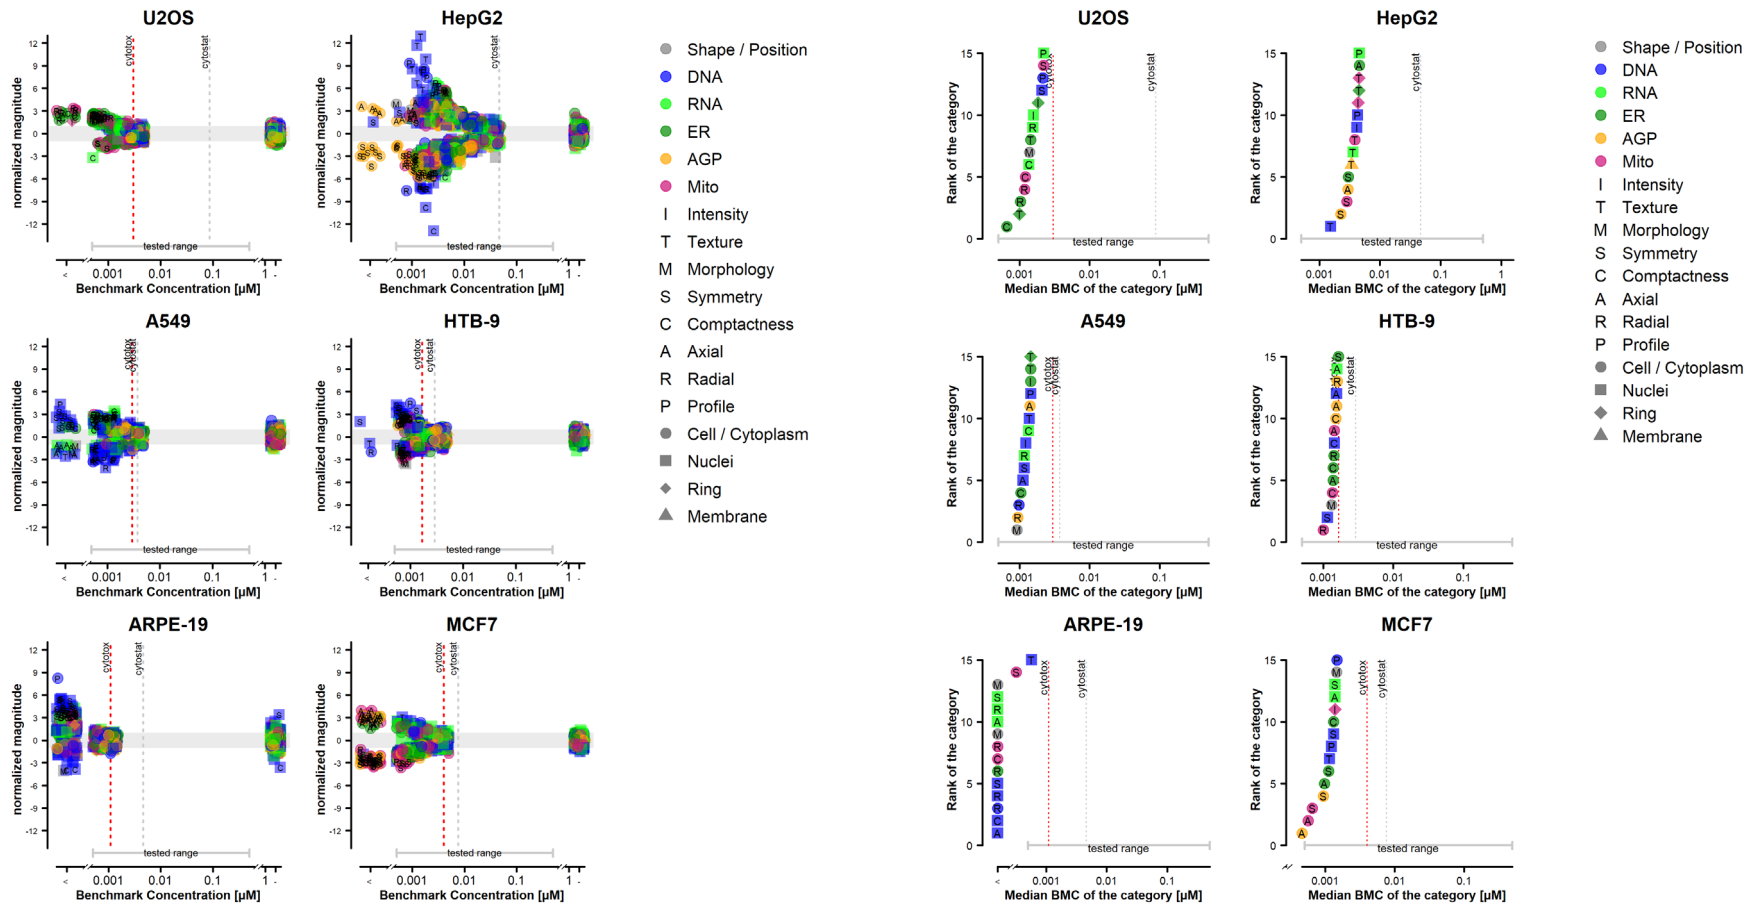



# Supplementary Figure 2L.

## Rotenone

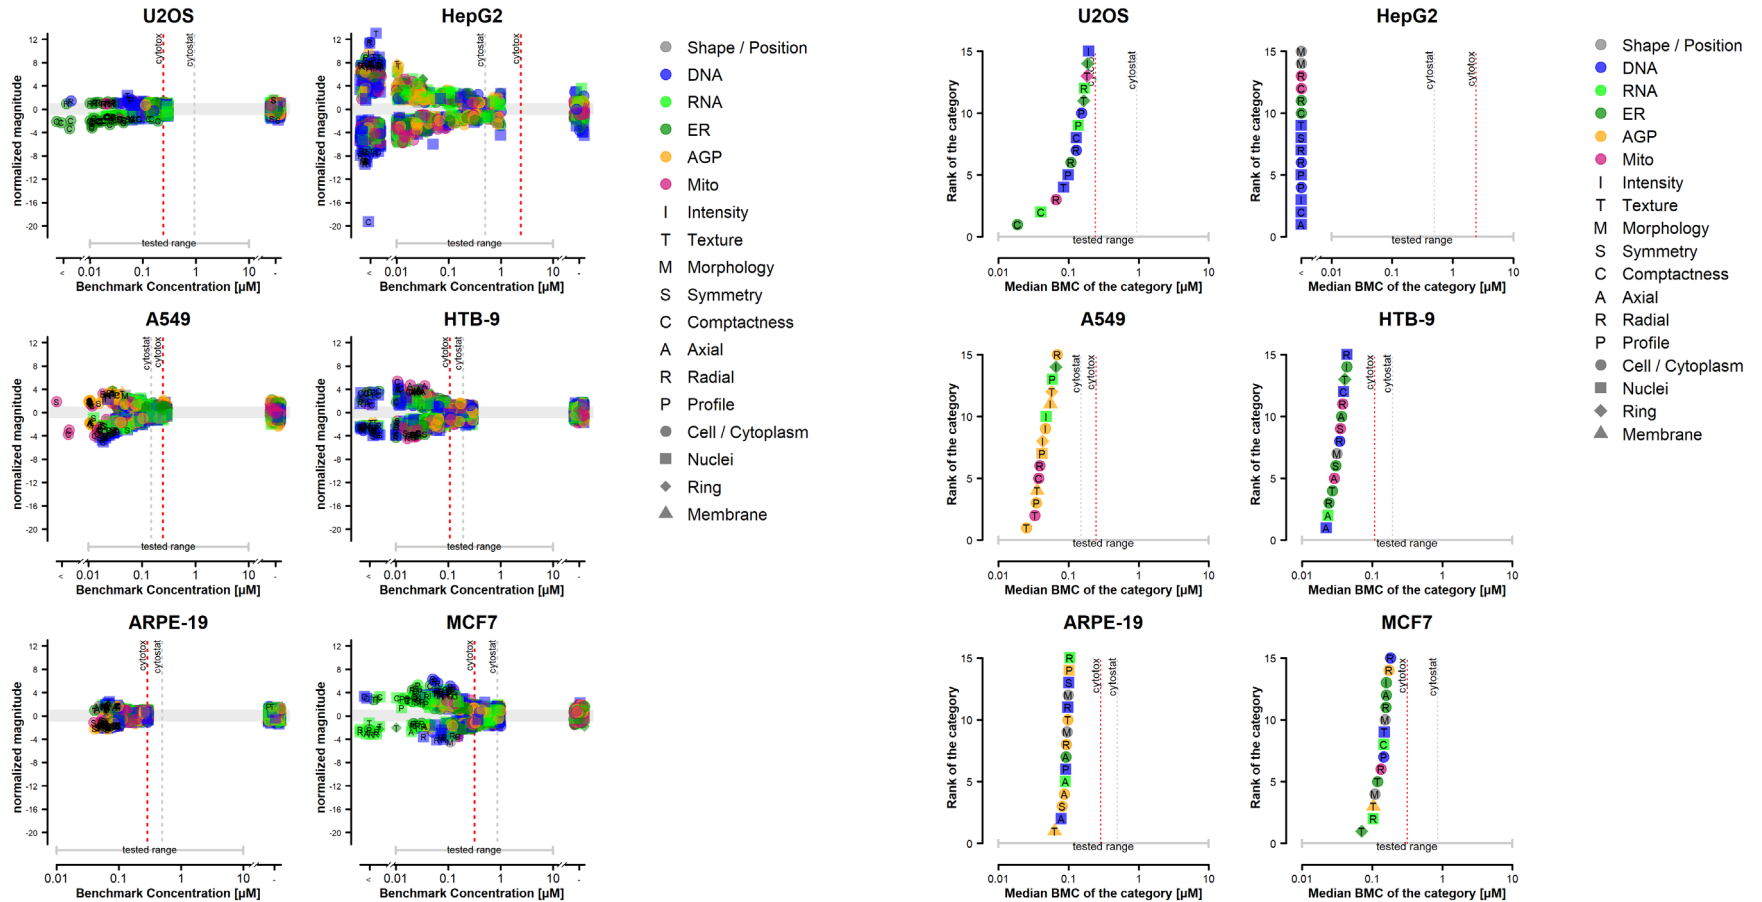



# Supplementary Figure 2N.

## Etoposide

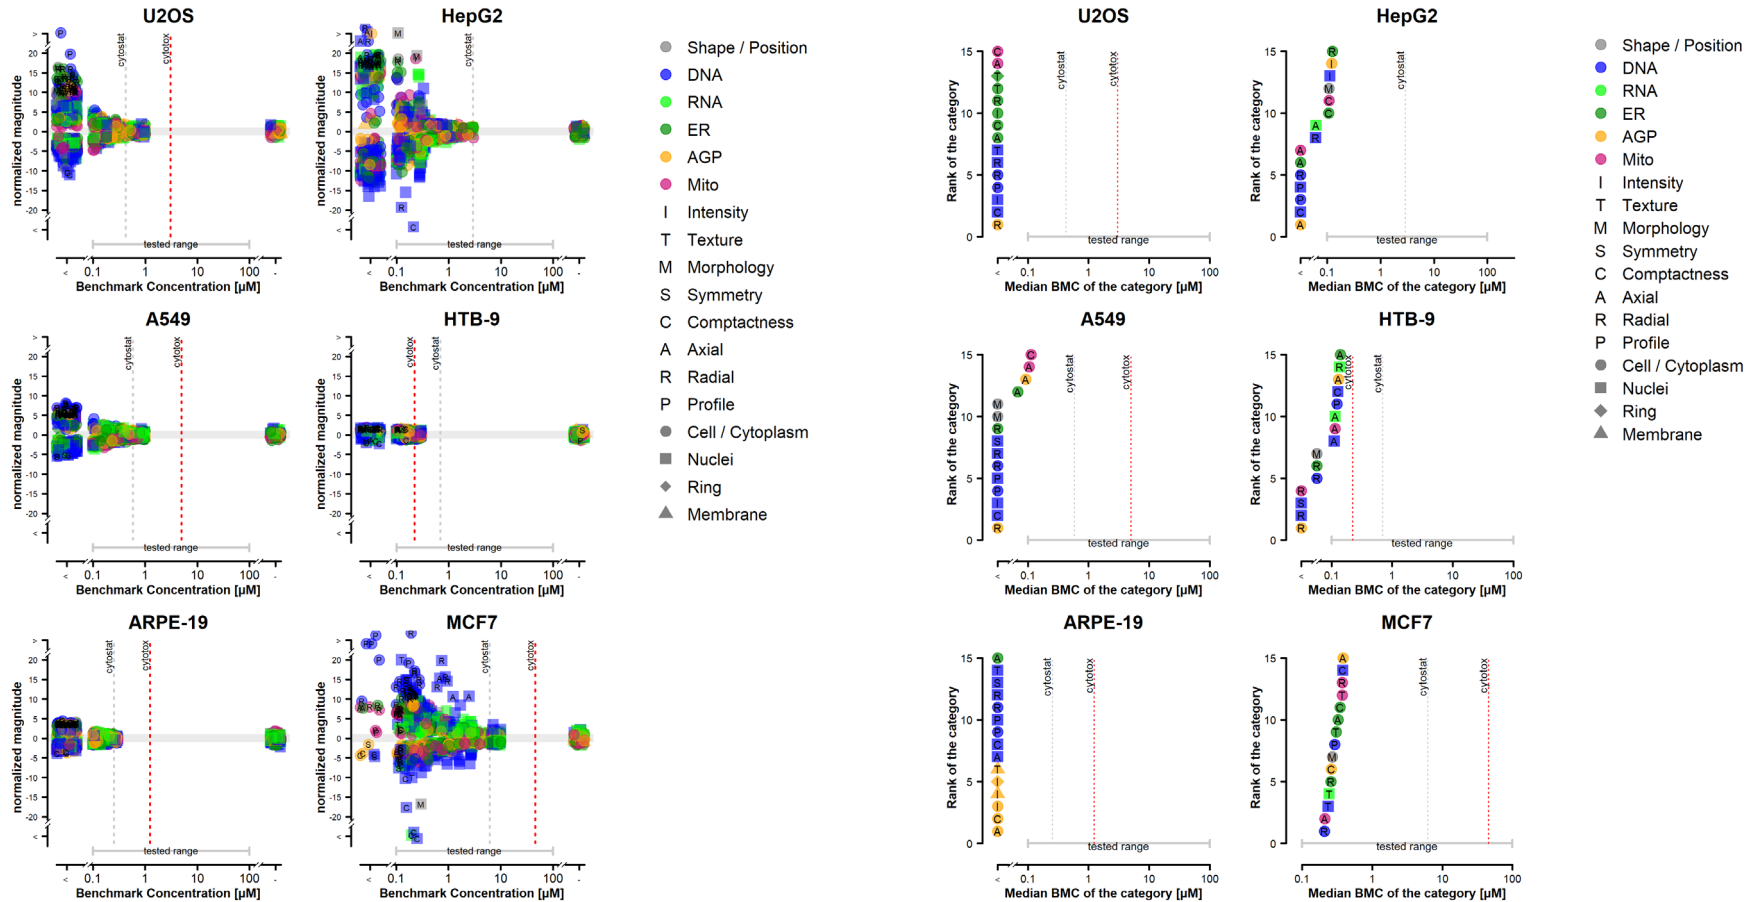

# Supplementary Figure 20.

## Rapamycin

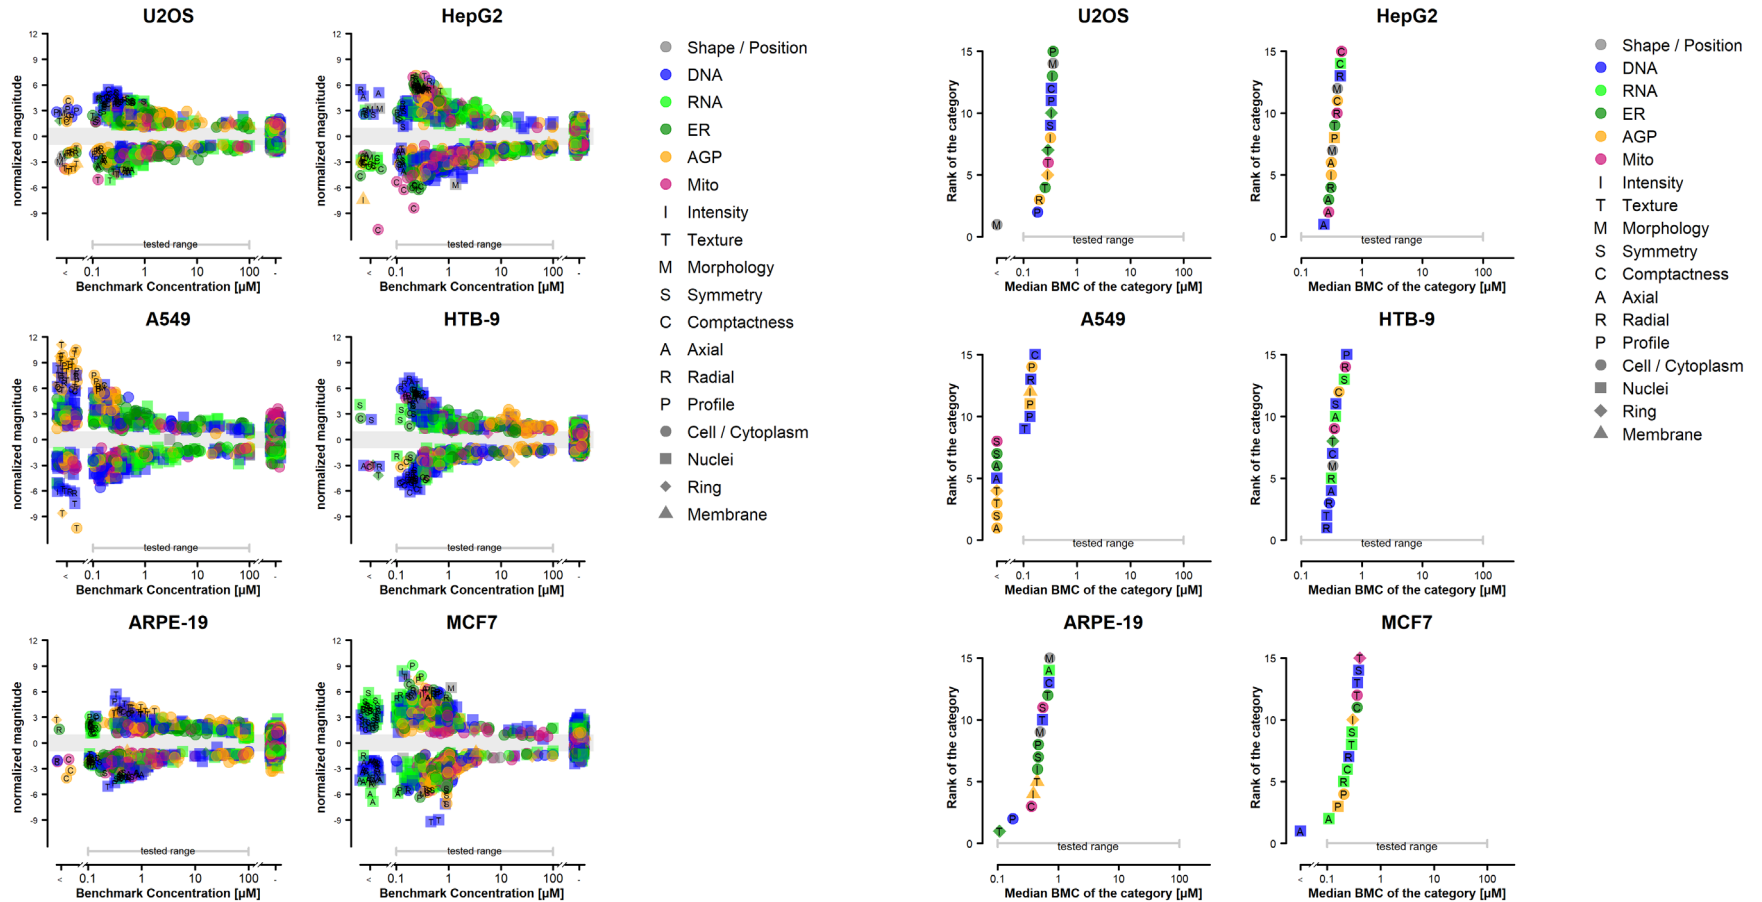

# Supplementary Figure 3

Plots of Cell Count and Cell Viability  
(Well level values normalized to DMSO Control)

- Supplementary Figure 3A. Sorbitol
- Supplementary Figure 3B. Saccharin
- Supplementary Figure 3C. Amperozide
- Supplementary Figure 3D. Fluphenazine
- Supplementary Figure 3E. Tetrandrine
- Supplementary Figure 3F. Ca-074-Me
- Supplementary Figure 3G. Metoclopramide
- Supplementary Figure 3H. NPPD
- Supplementary Figure 3I. Fenbendazole
- Supplementary Figure 3J. Oxibendazole
- Supplementary Figure 3K. Taxol
- Supplementary Figure 3L. Rotenone
- Supplementary Figure 3M. Latrunculin B
- Supplementary Figure 3N. Etoposide
- Supplementary Figure 3O. Rapamycin
- Supplementary Figure 3P. Berberine Chloride

\*\*Purple values in each panel are the CP POD in  $\mu\text{M}$ . NA = CP POD not determined. < TR = CP POD below tested concentration range.

# Supplementary Figure 3A.

## Sorbitol

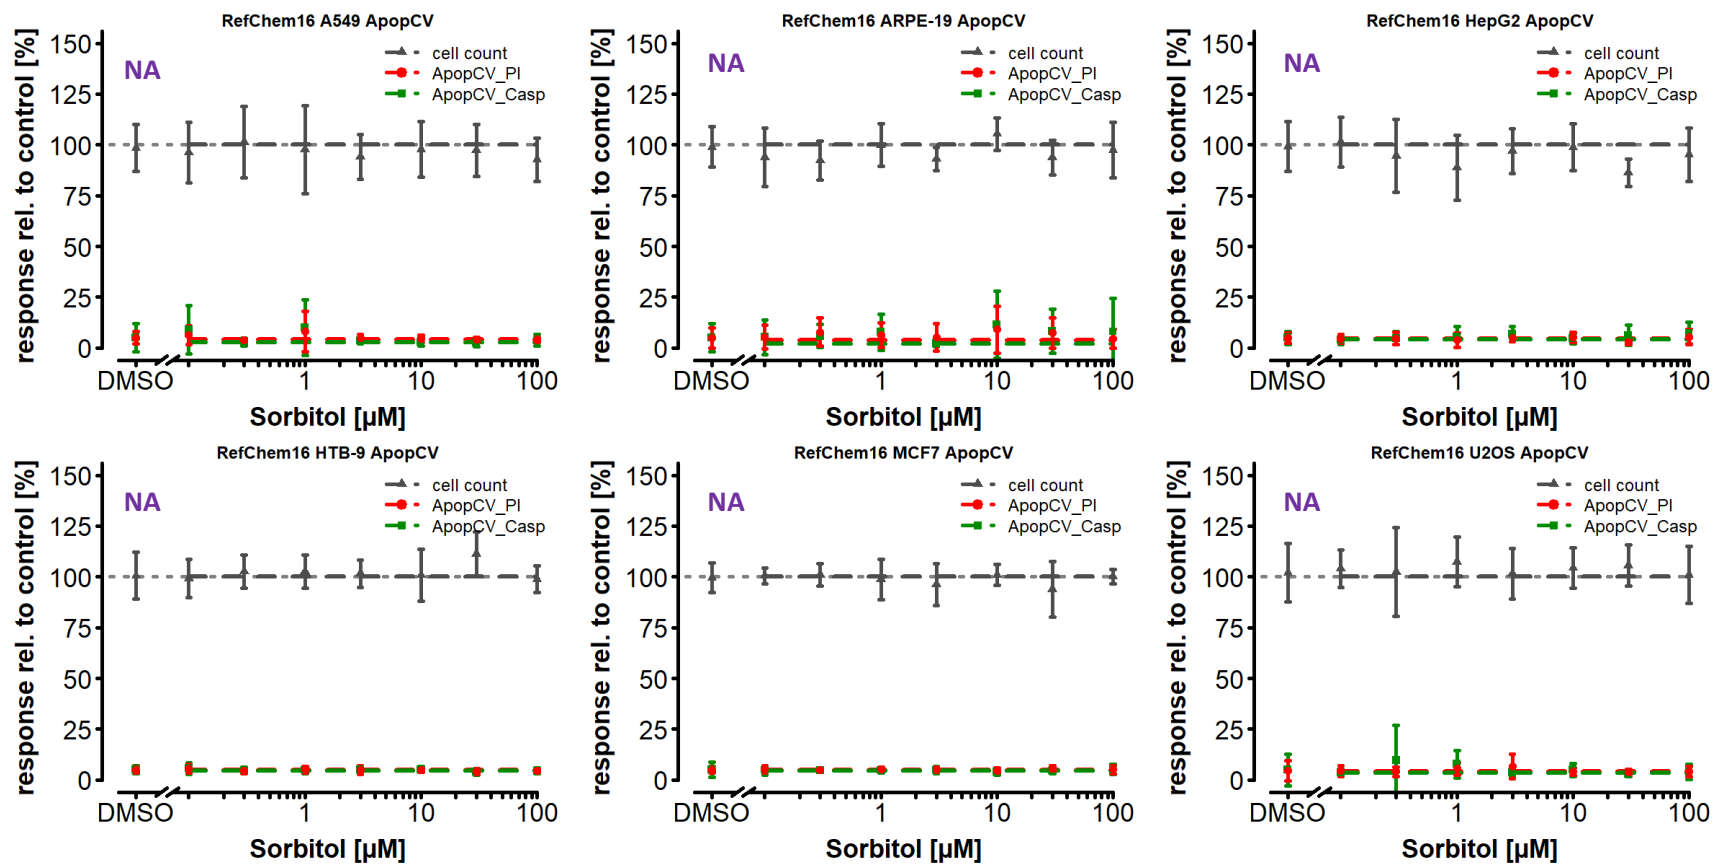

# Supplementary Figure 3B.

## Saccharin

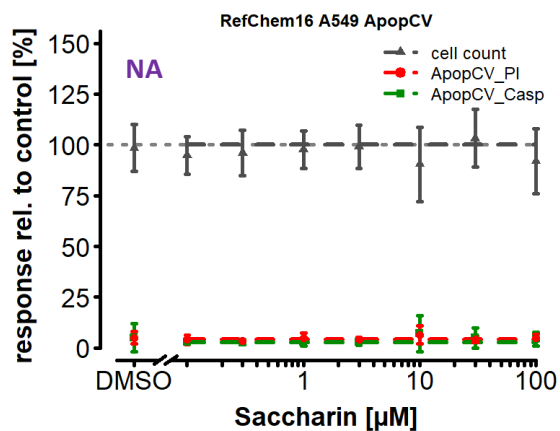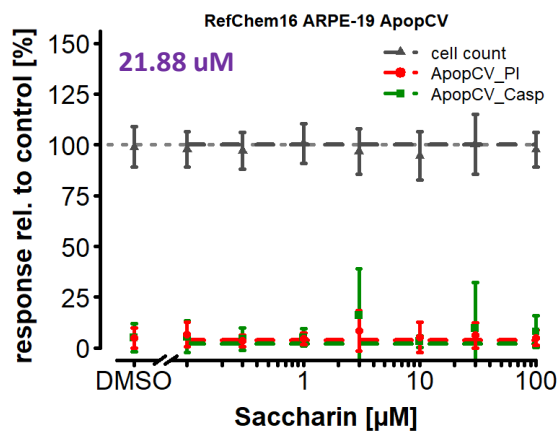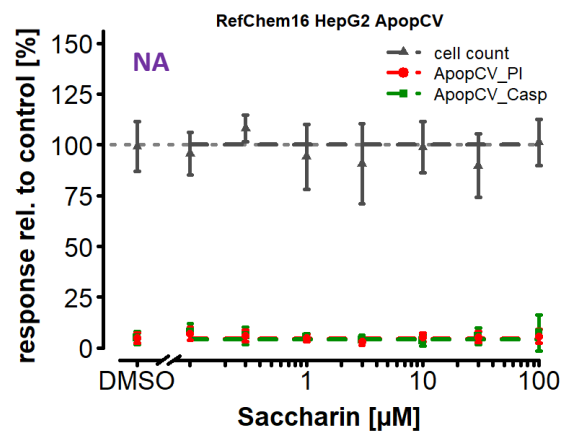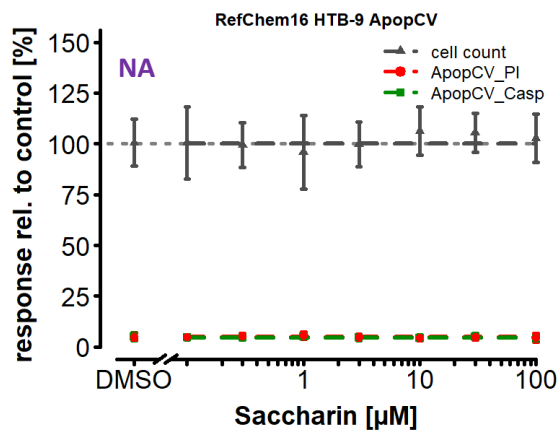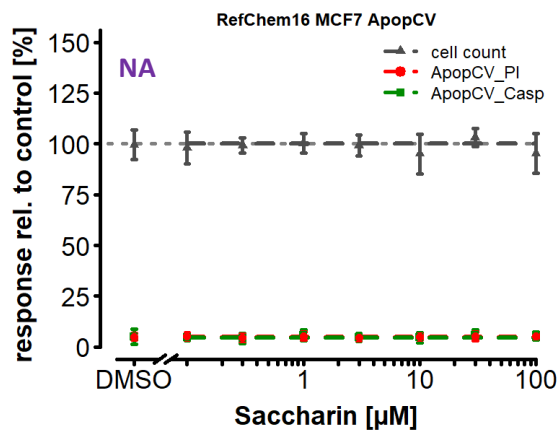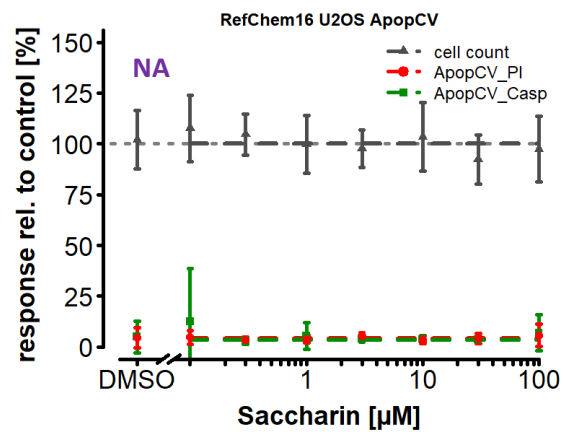

# Supplementary Figure 3C.

## Amperozide

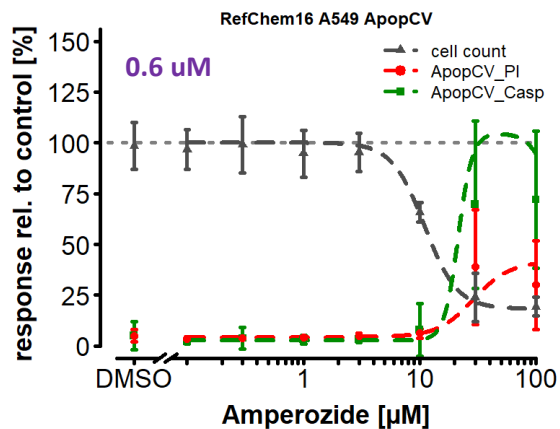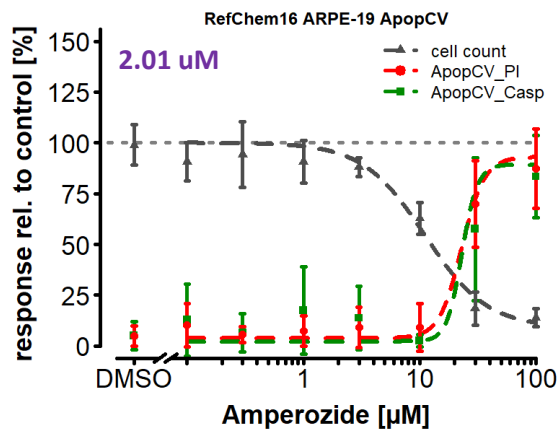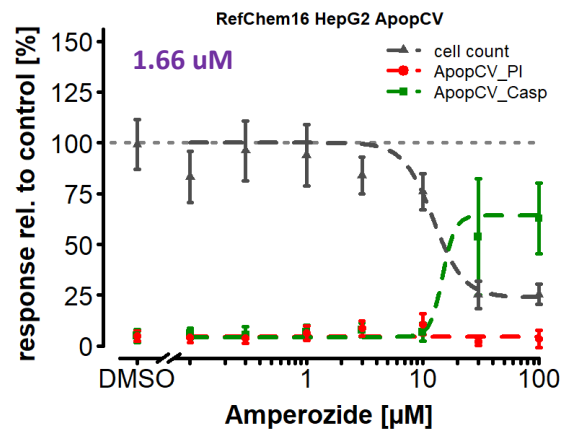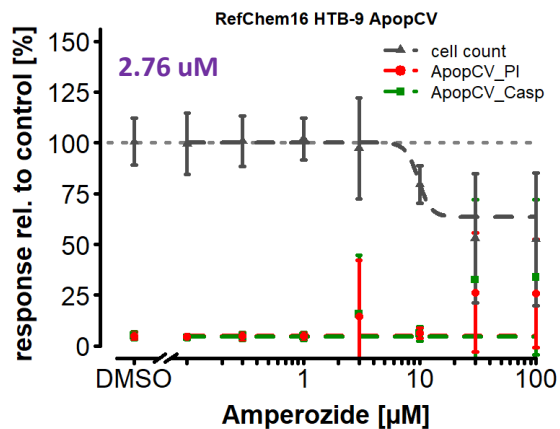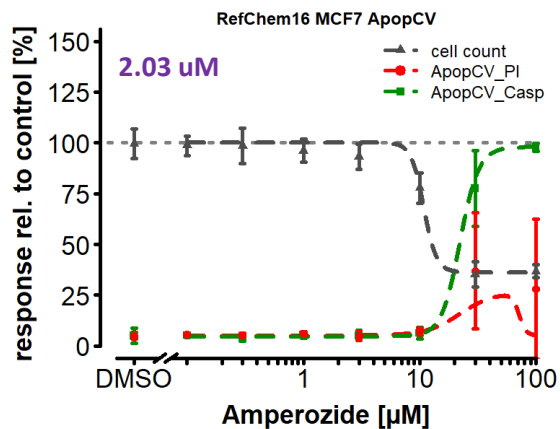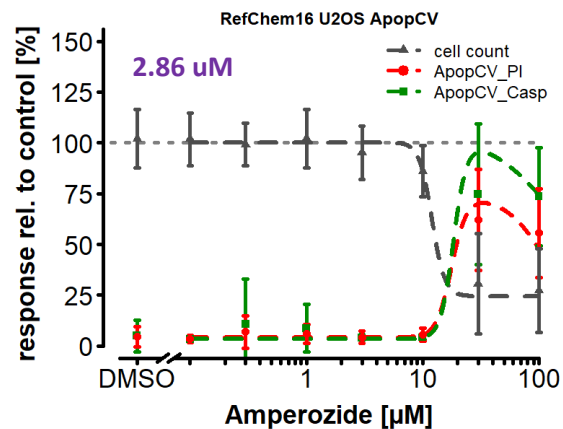



# Supplementary Figure 3D.

## Fluphenazine

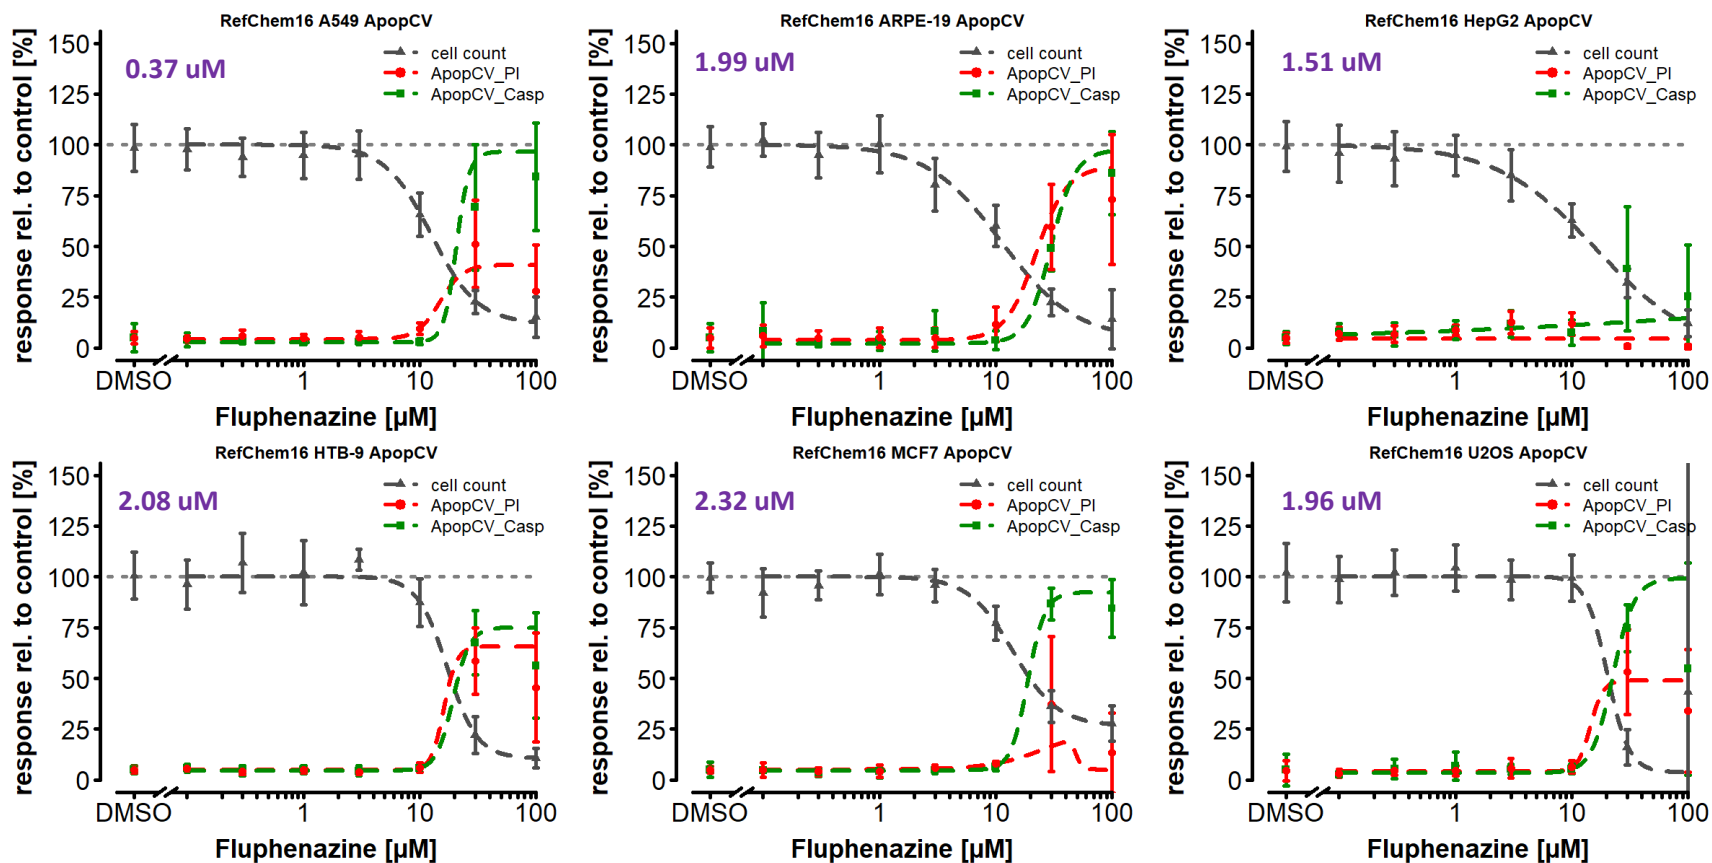

# Supplementary Figure 3E.

## Tetrandrine

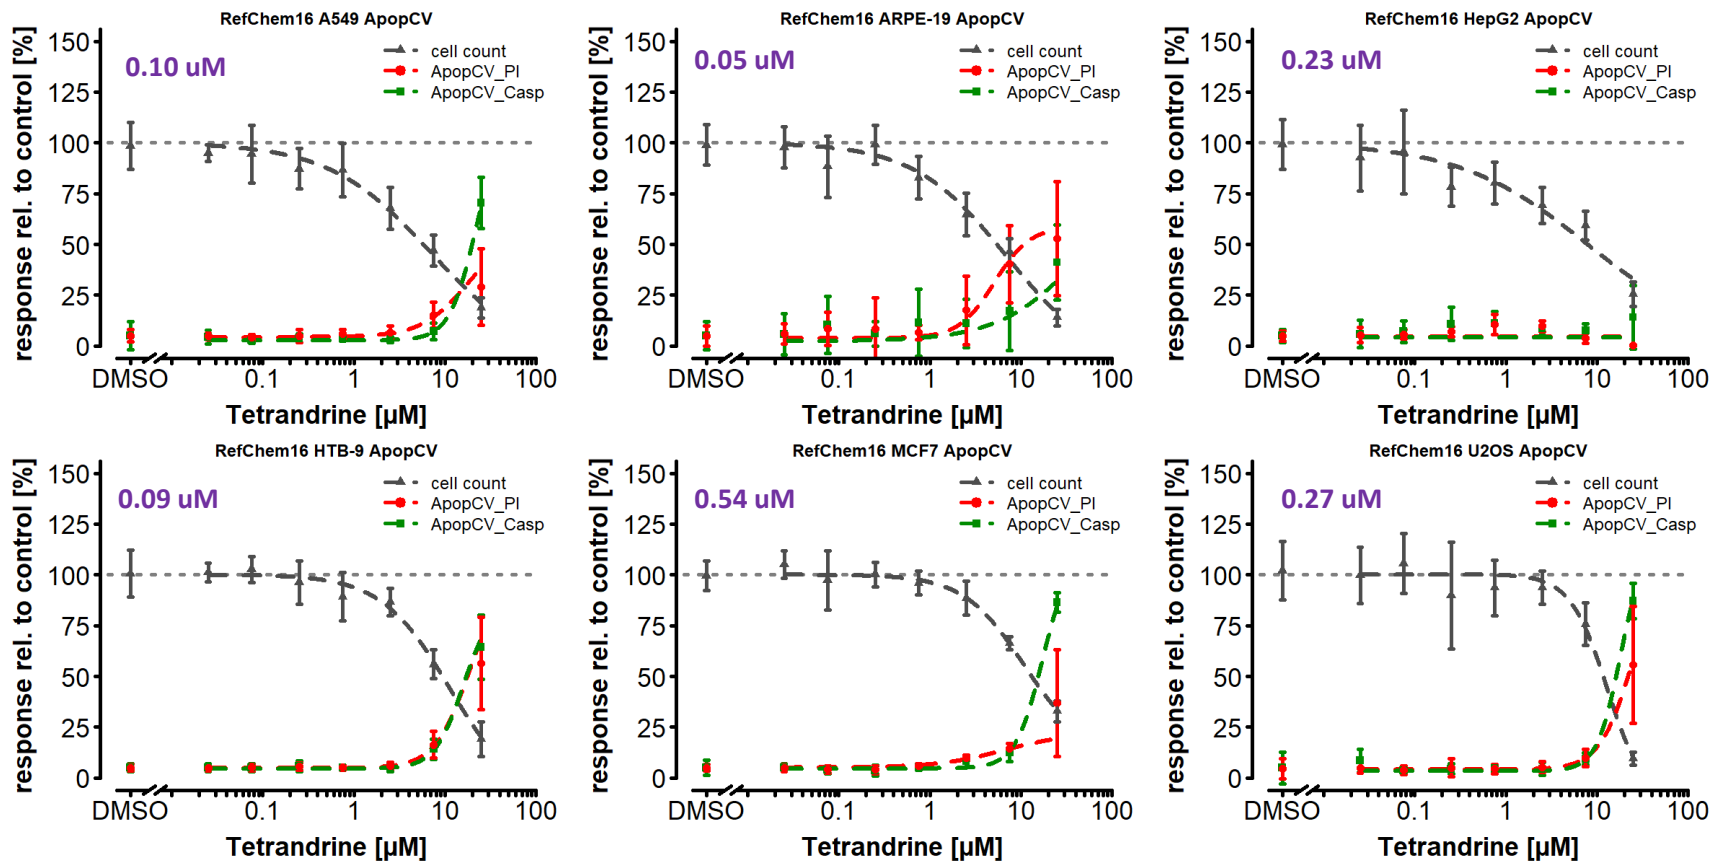

# Supplementary Figure 3F.

## Ca-074-Me

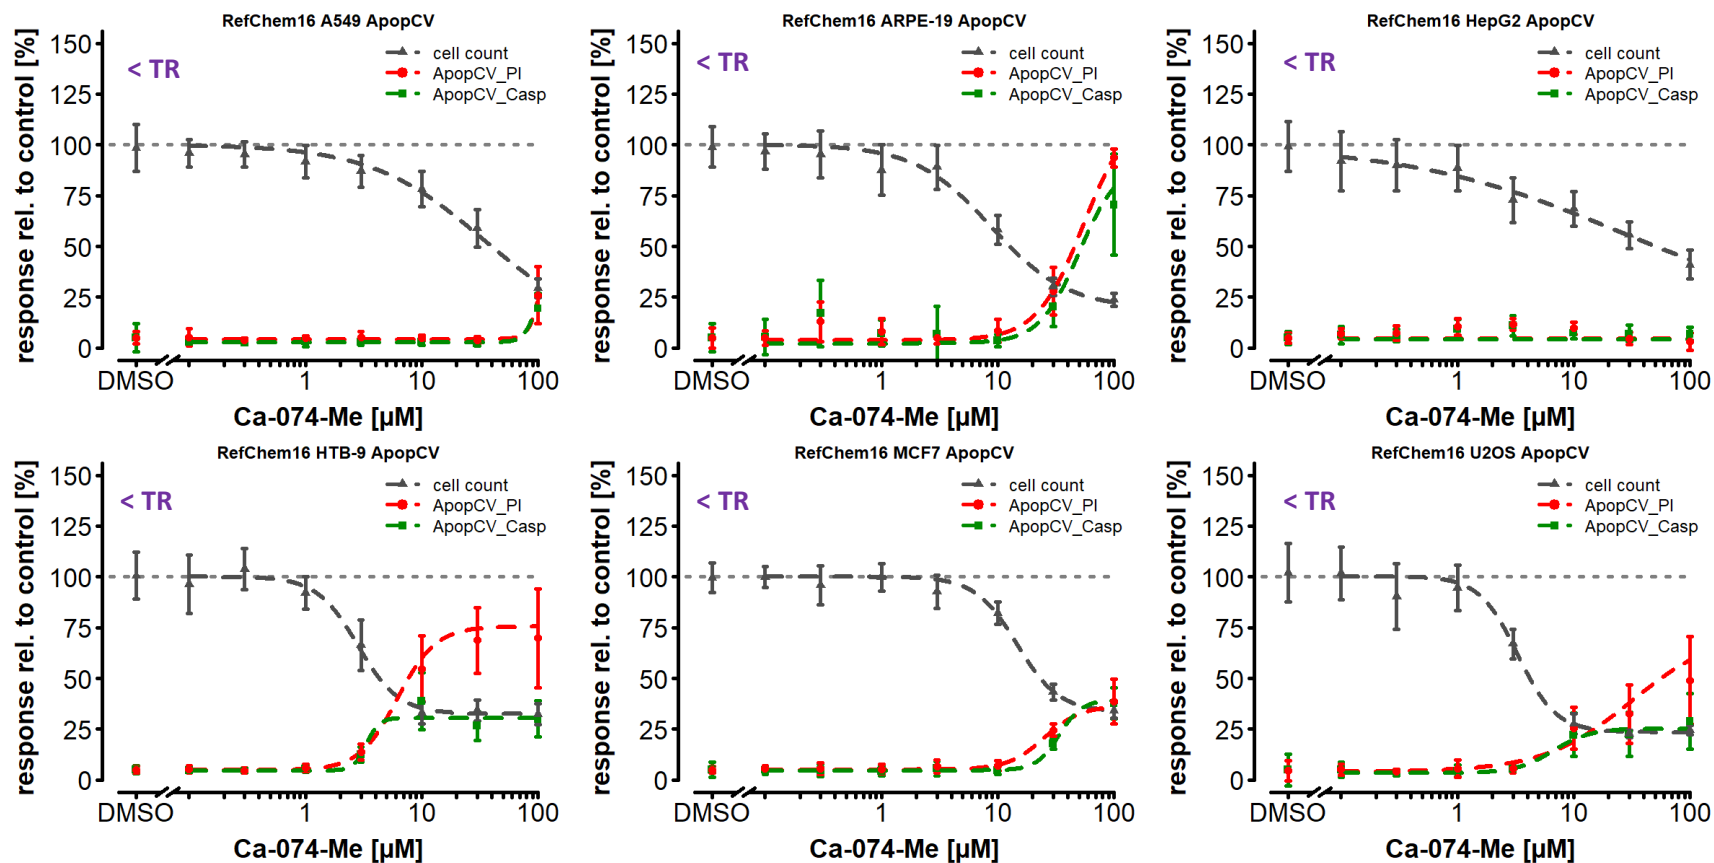

# Supplementary Figure 3G.

## Metoclopramide

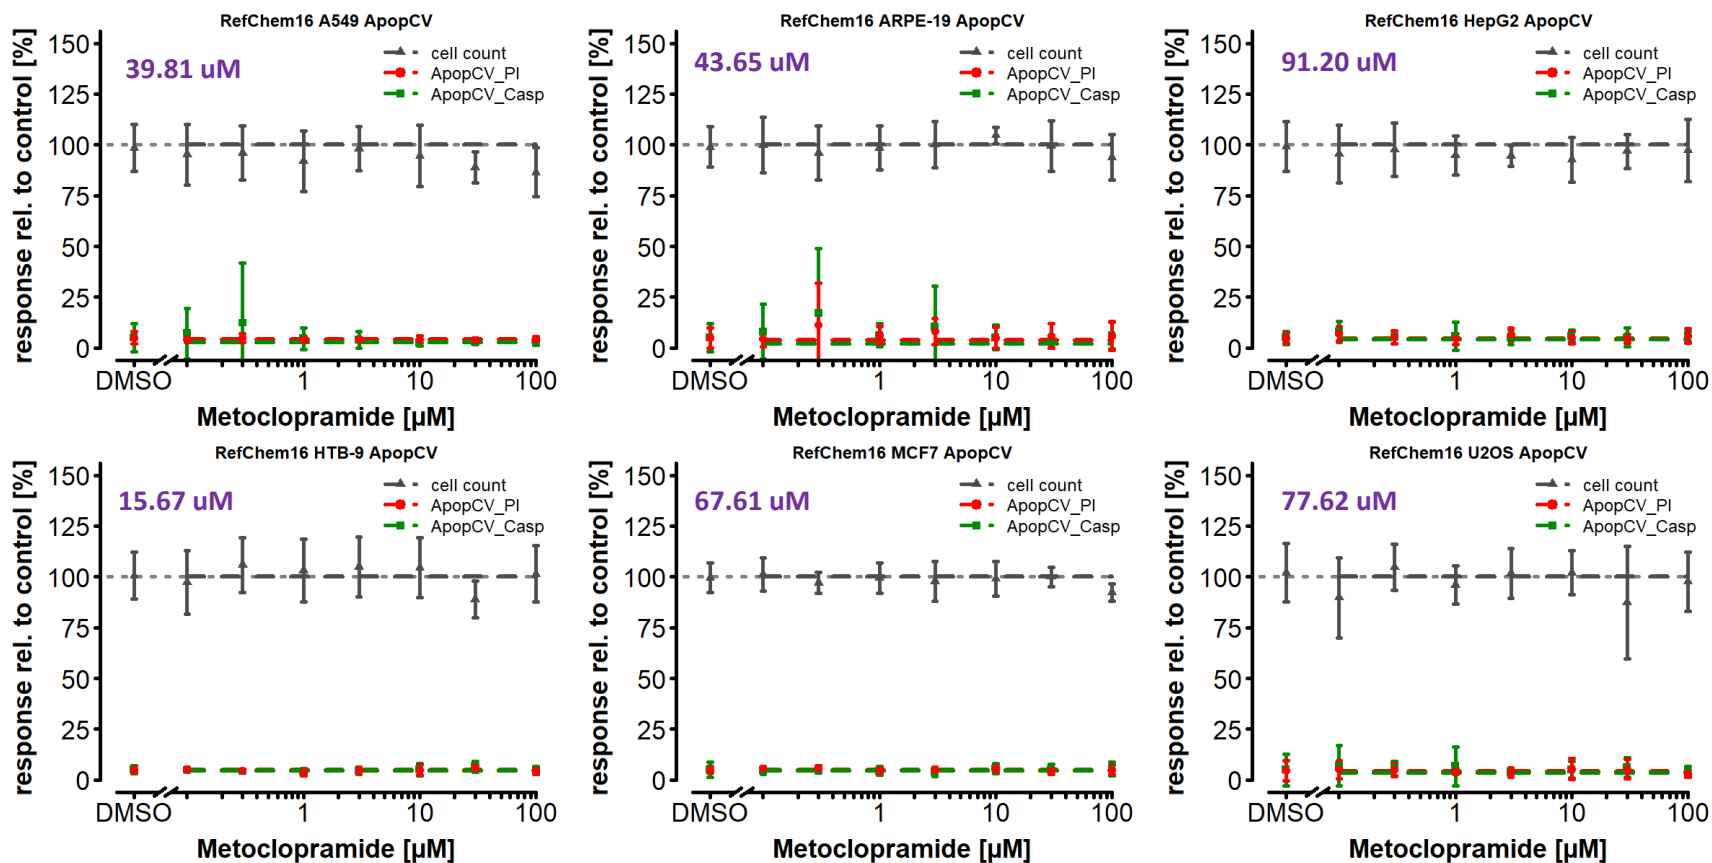

# Supplementary Figure 3H.

## NPPD

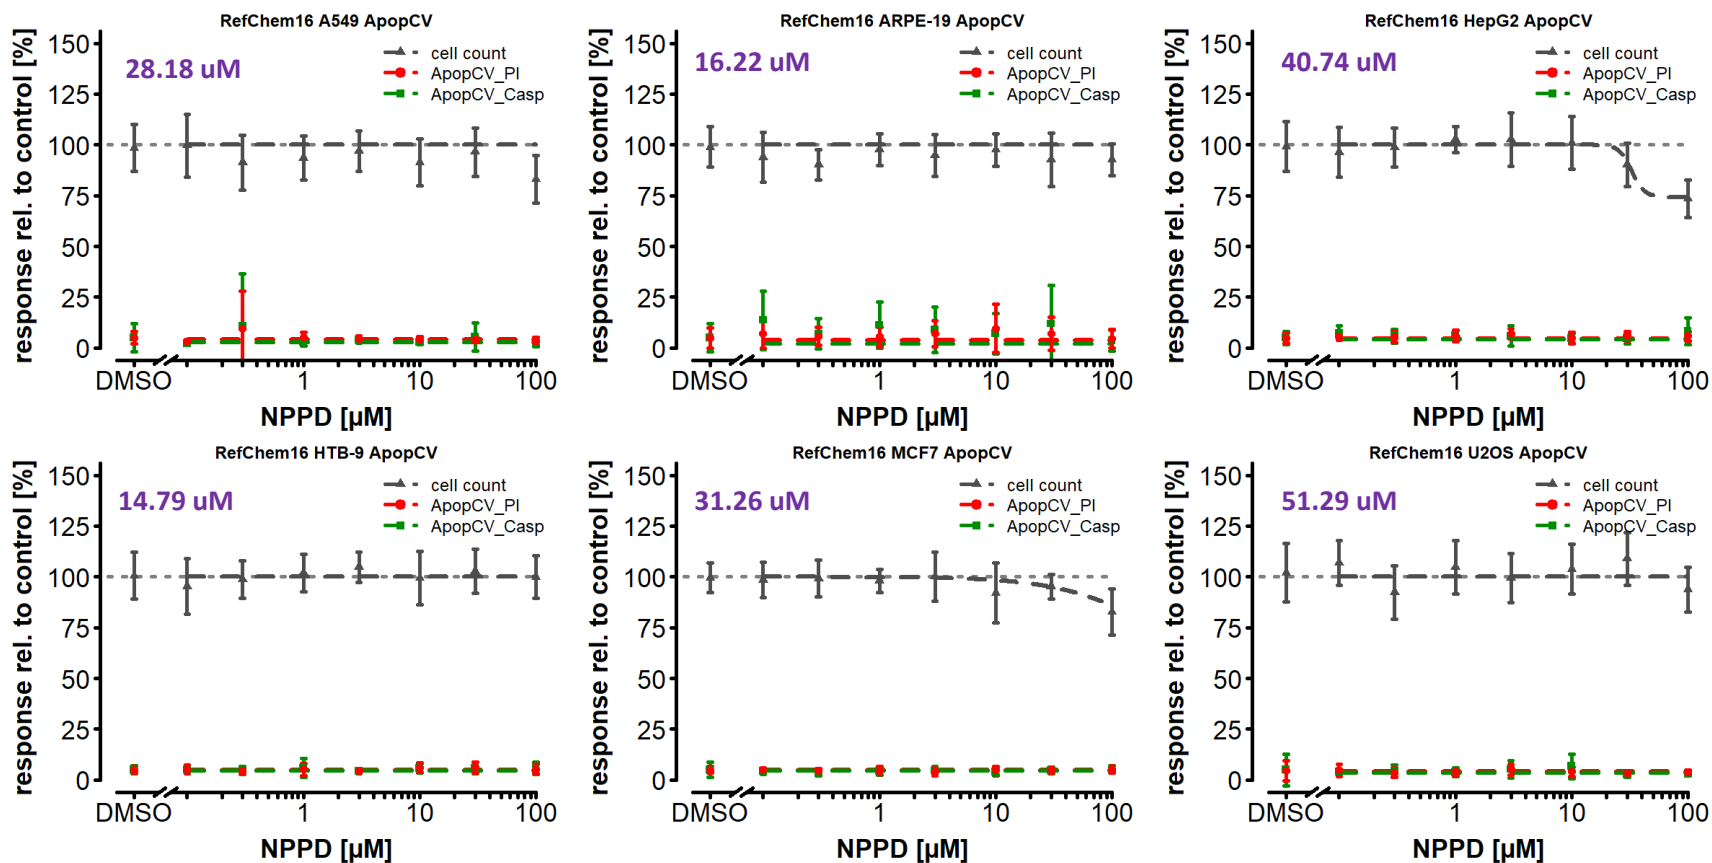

# Supplementary Figure 3I.

## Fenbendazole

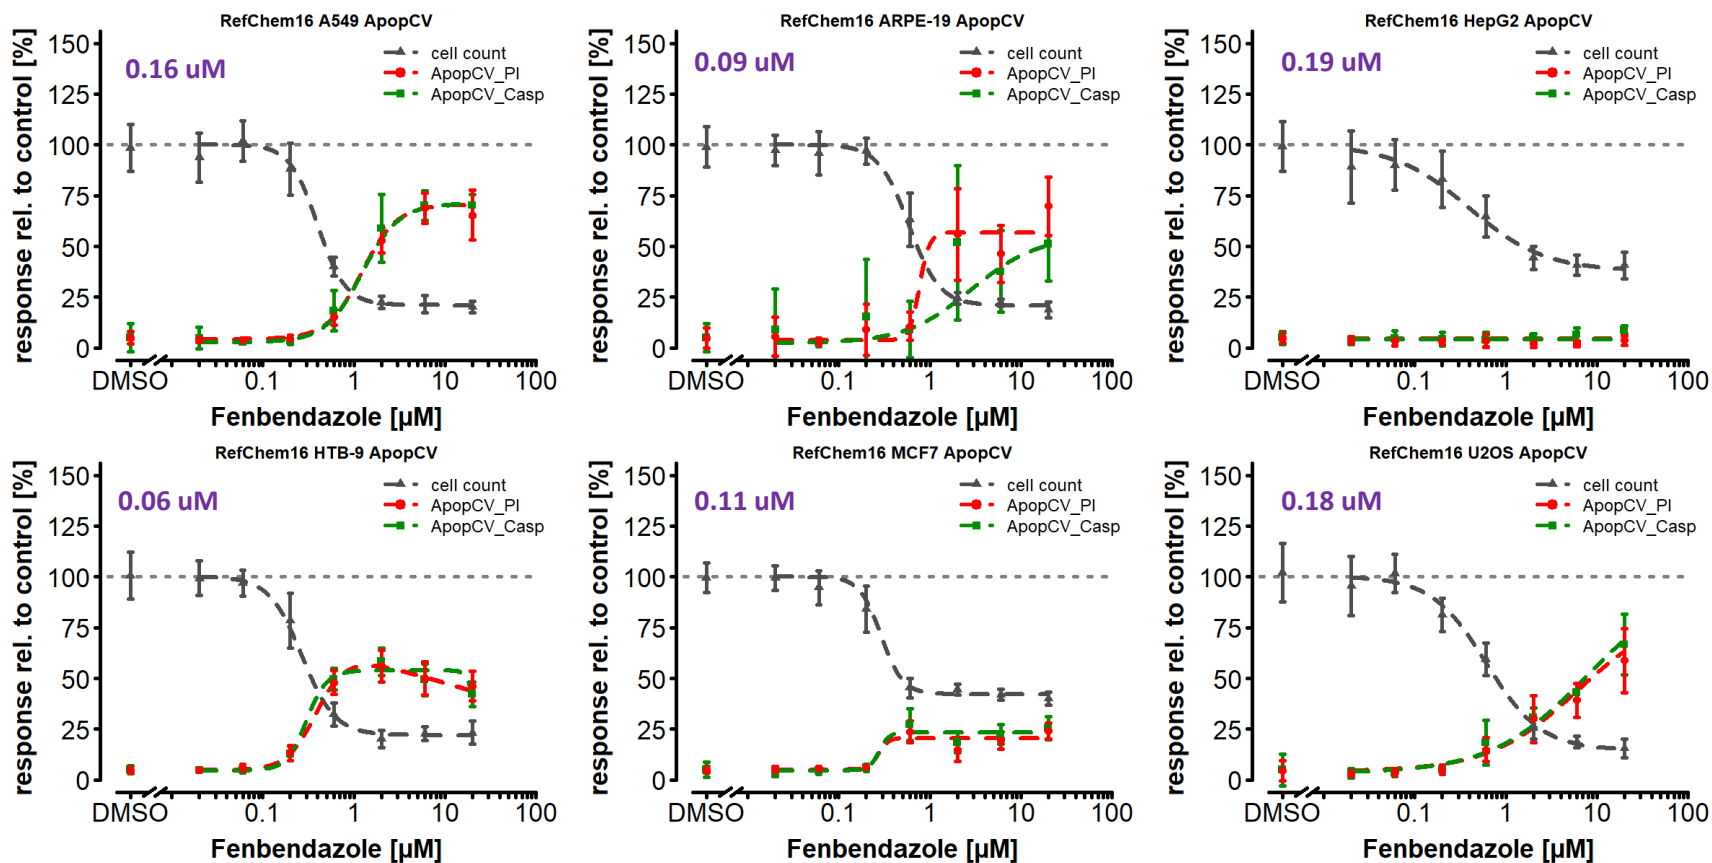

# Supplementary Figure 3J.

## Oxibendazole

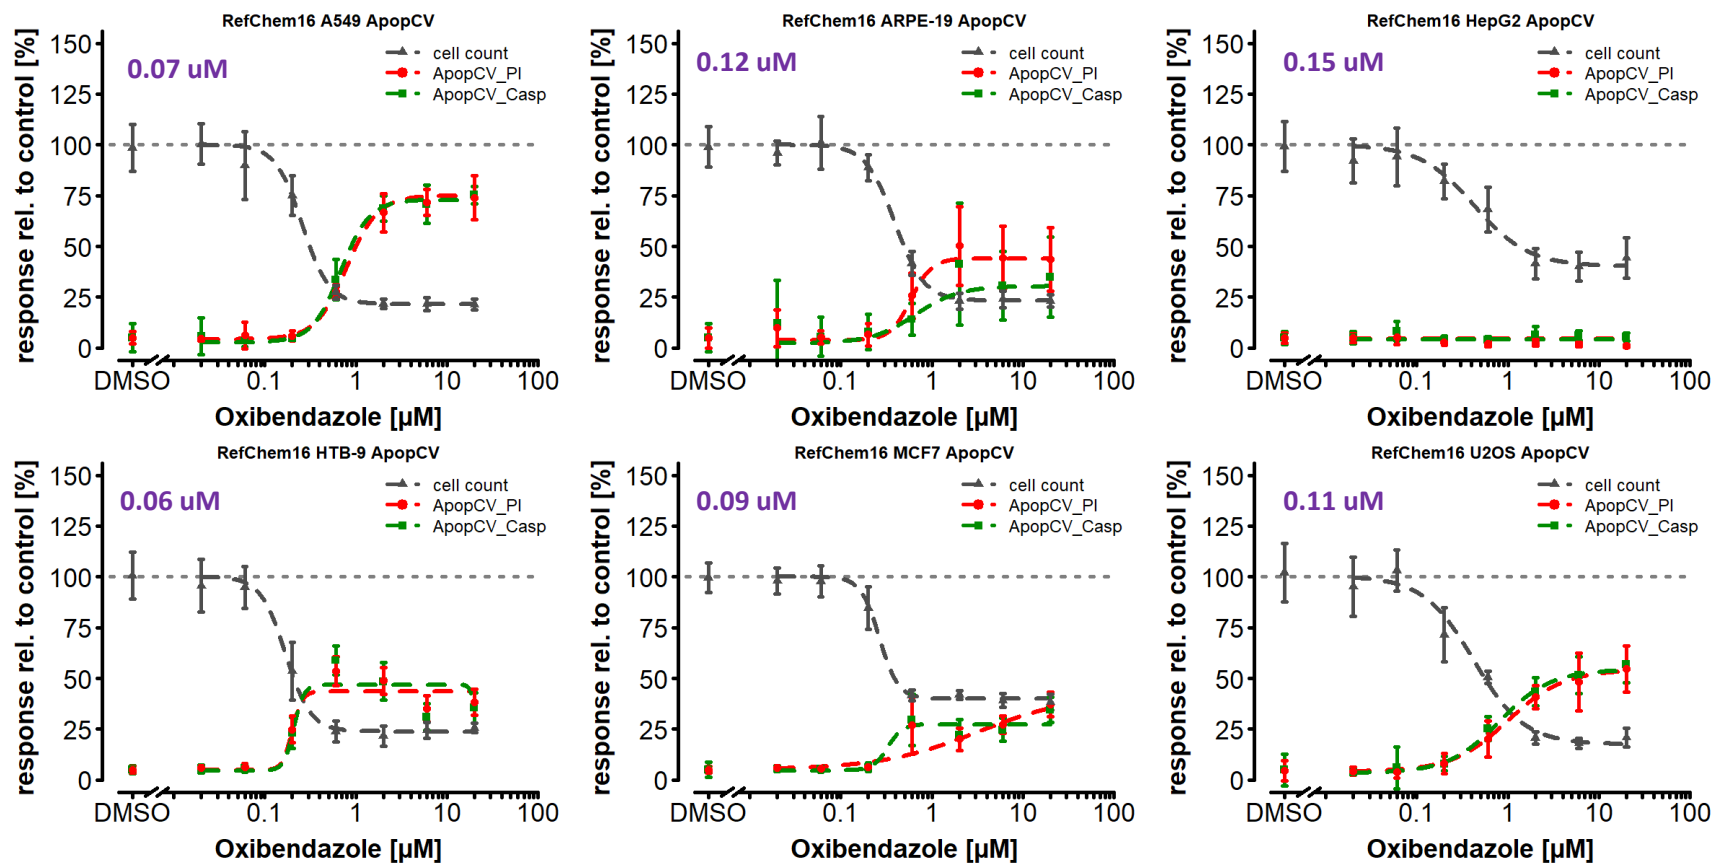

# Supplementary Figure 3K.

## Taxol

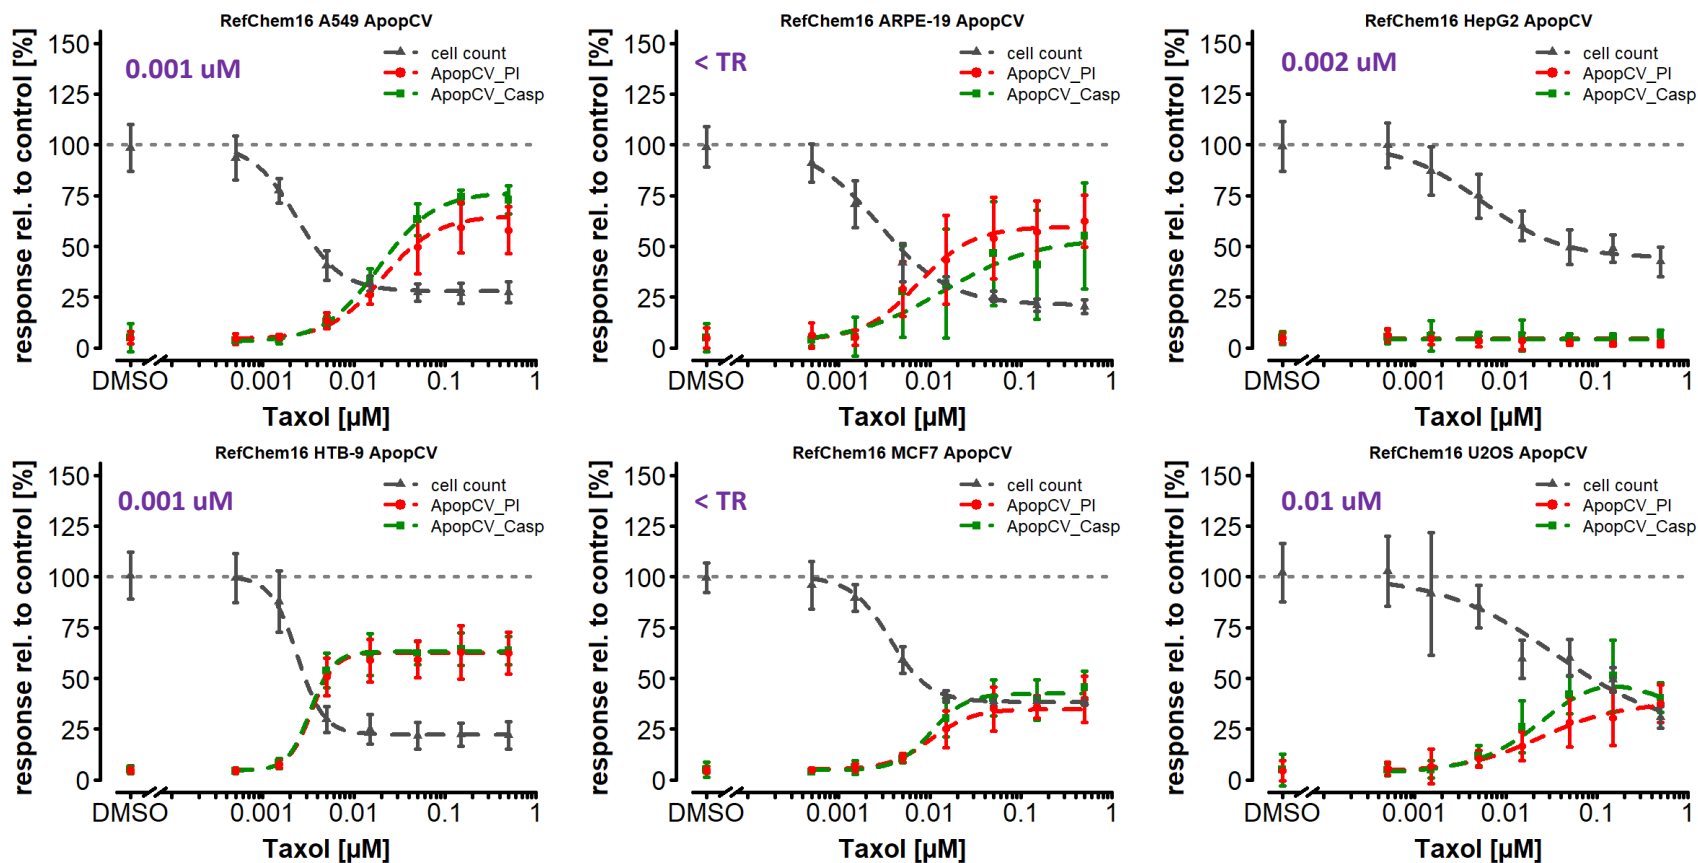



# Supplementary Figure 3L

## Rotenone

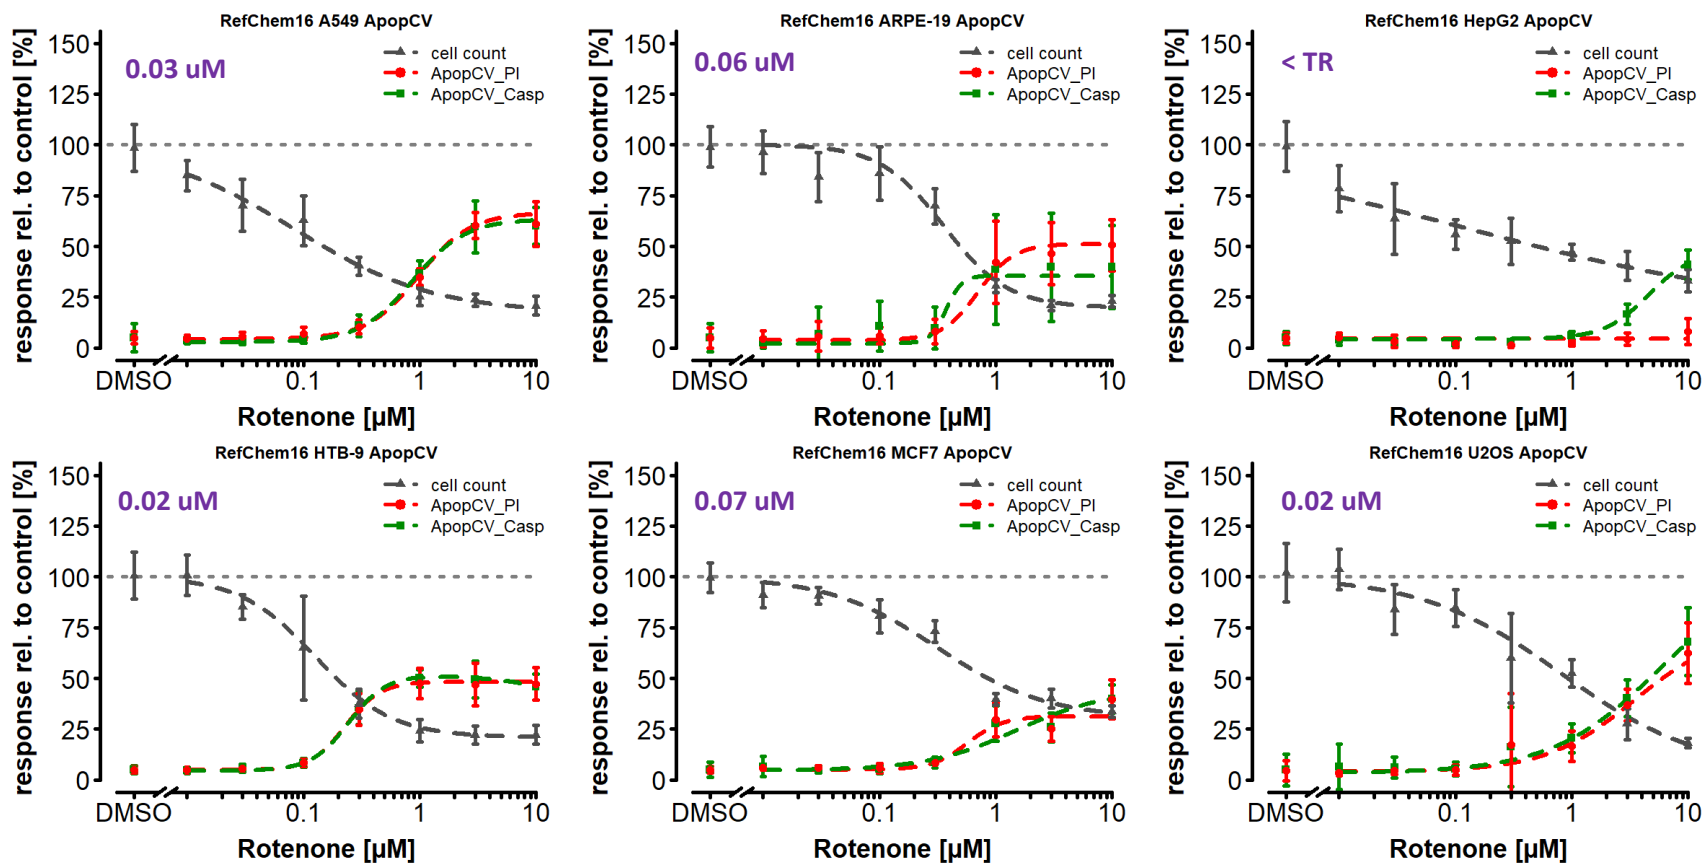

# Supplementary Figure 3M.

## Latrunculin B

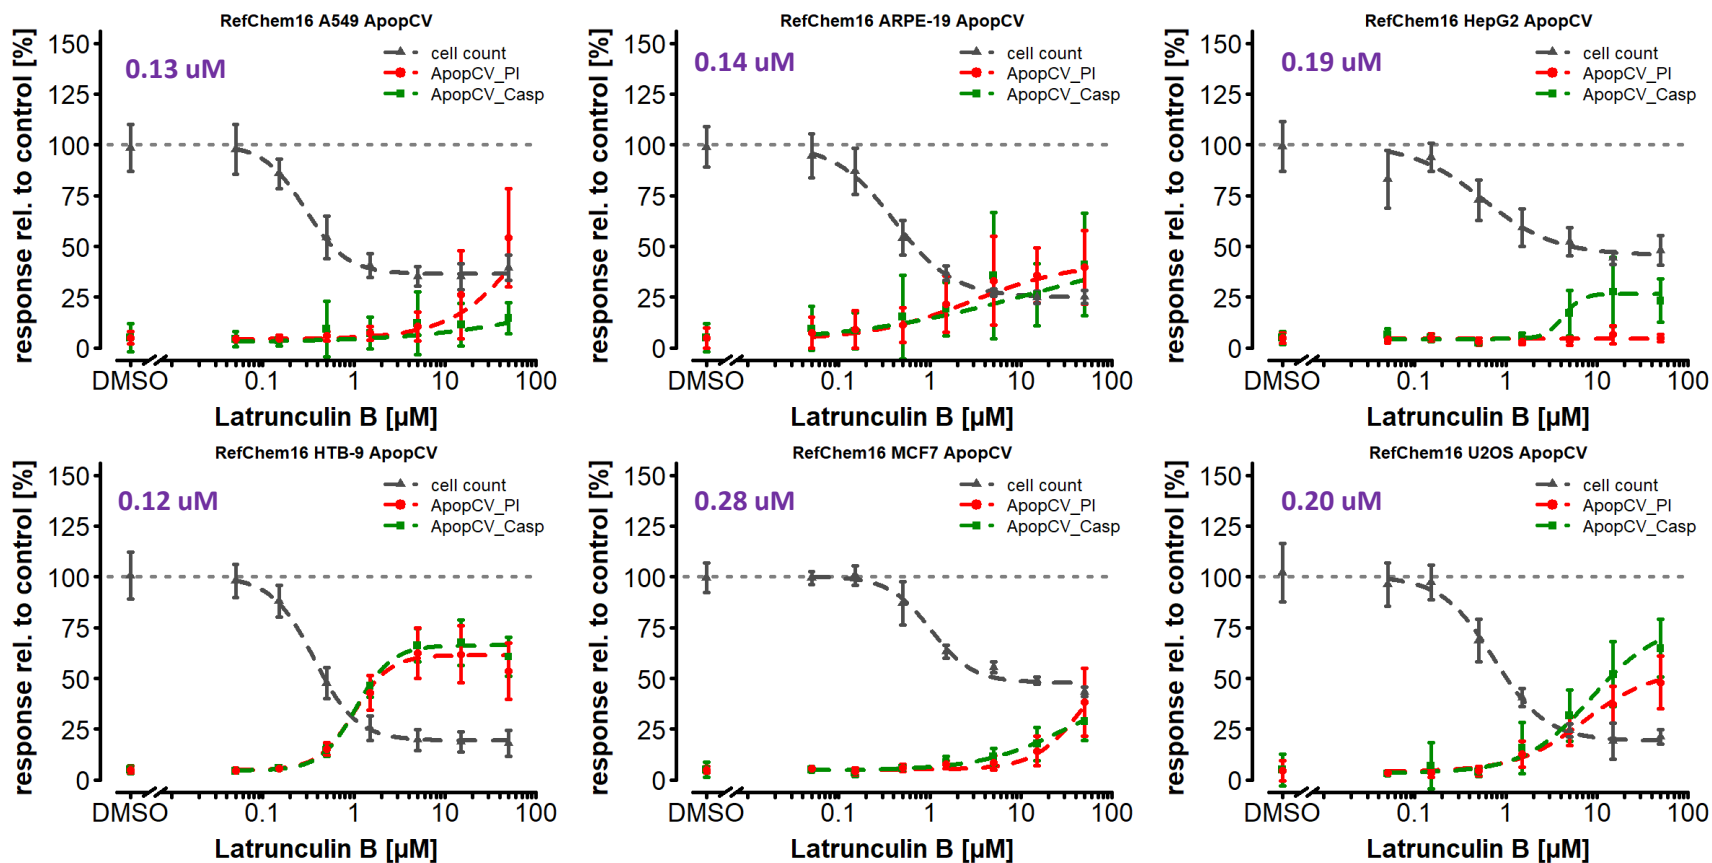

# Supplementary Figure 3N.

## Etoposide

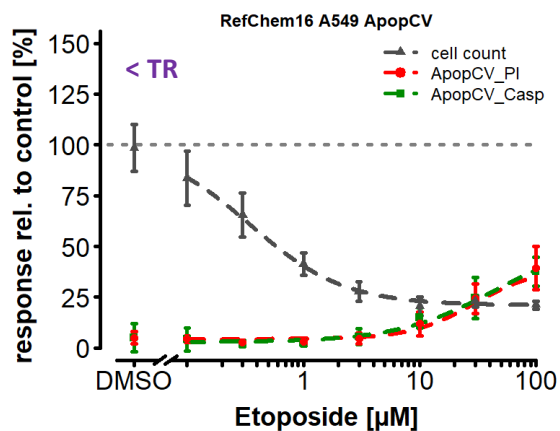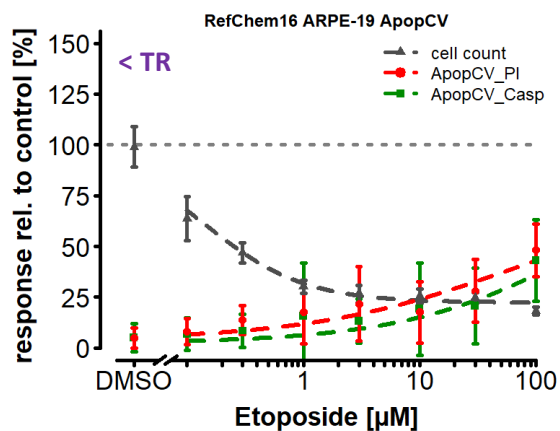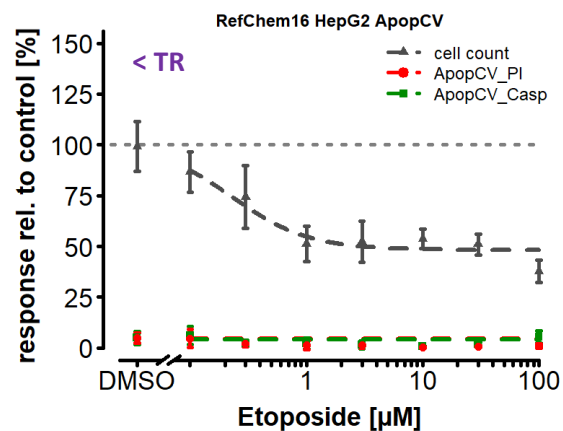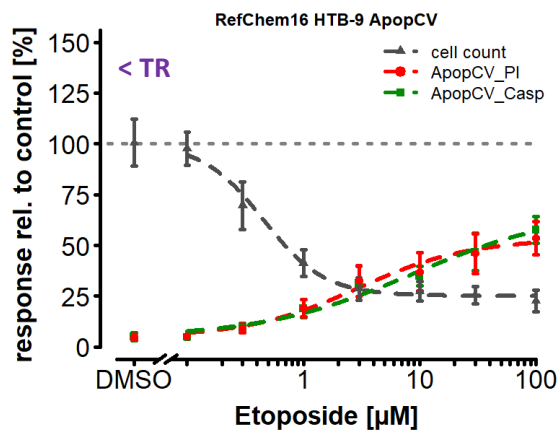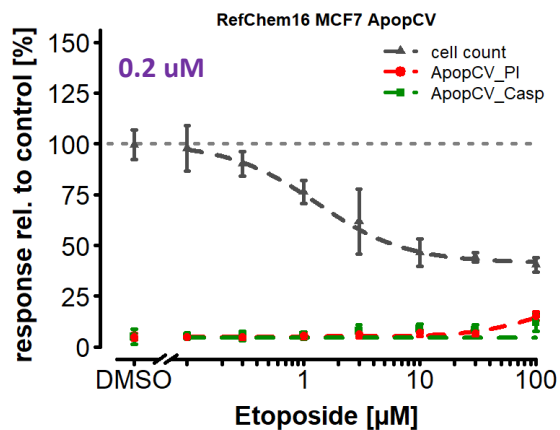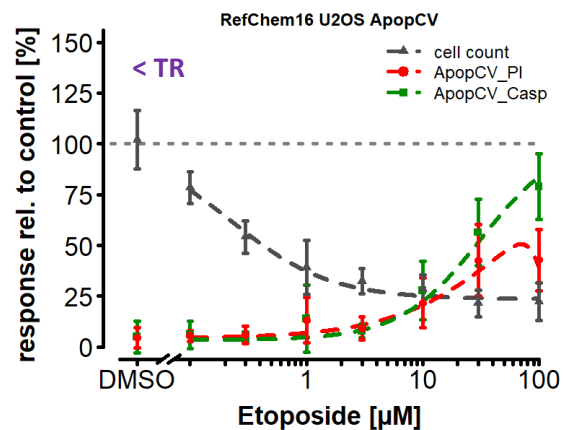

# Supplementary Figure 30.

## Rapamycin

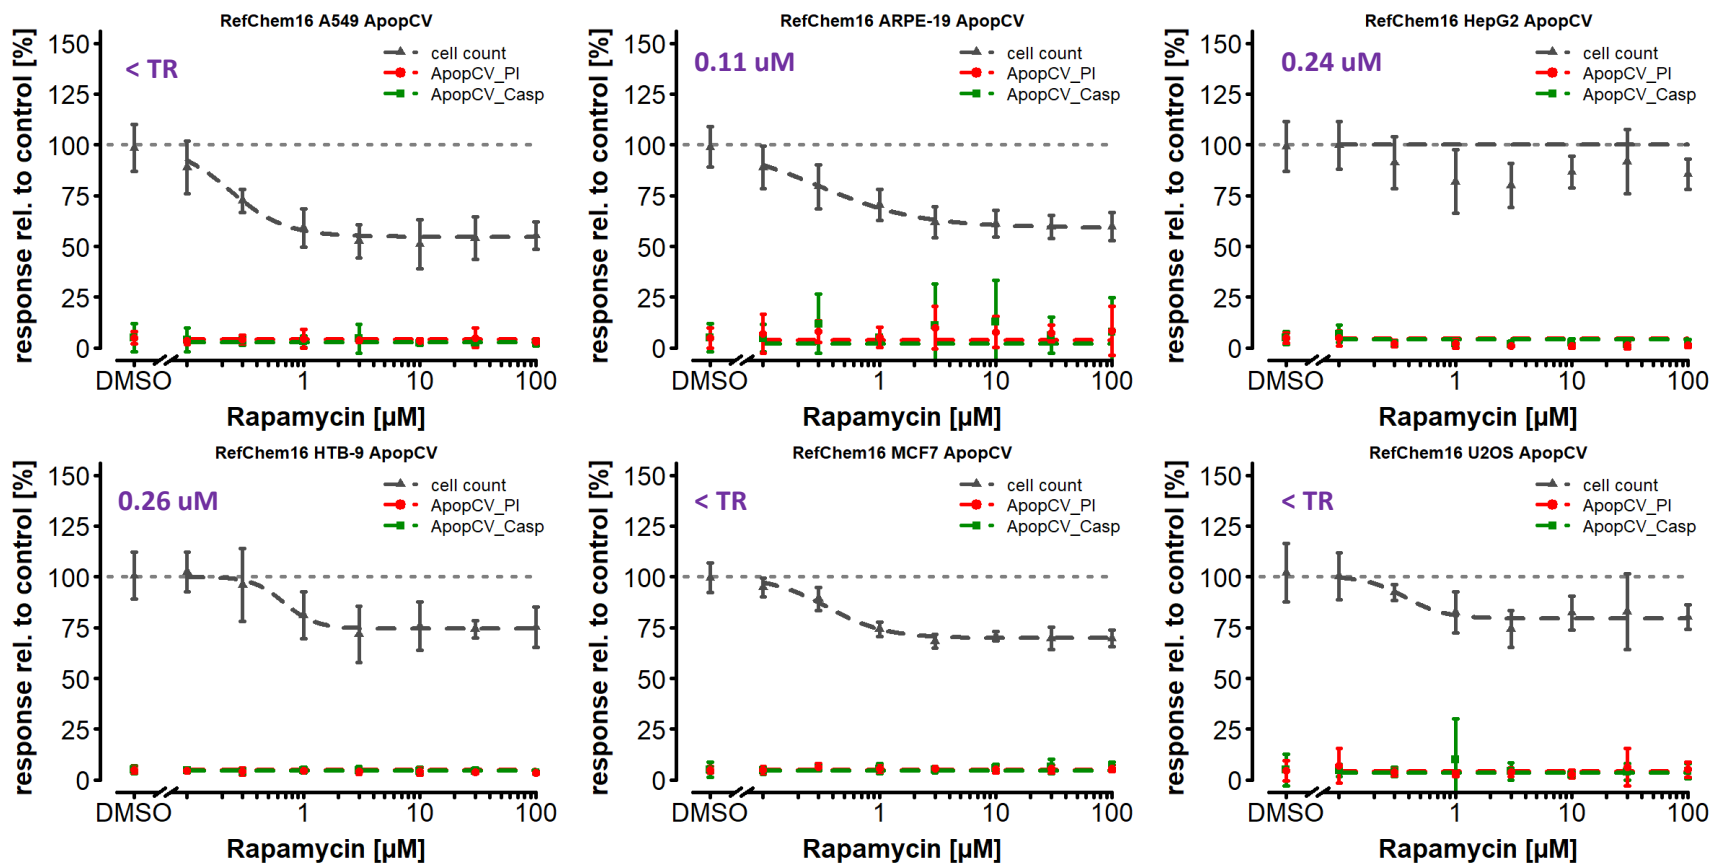

# Supplementary Figure 3P.

## Berberine Chloride

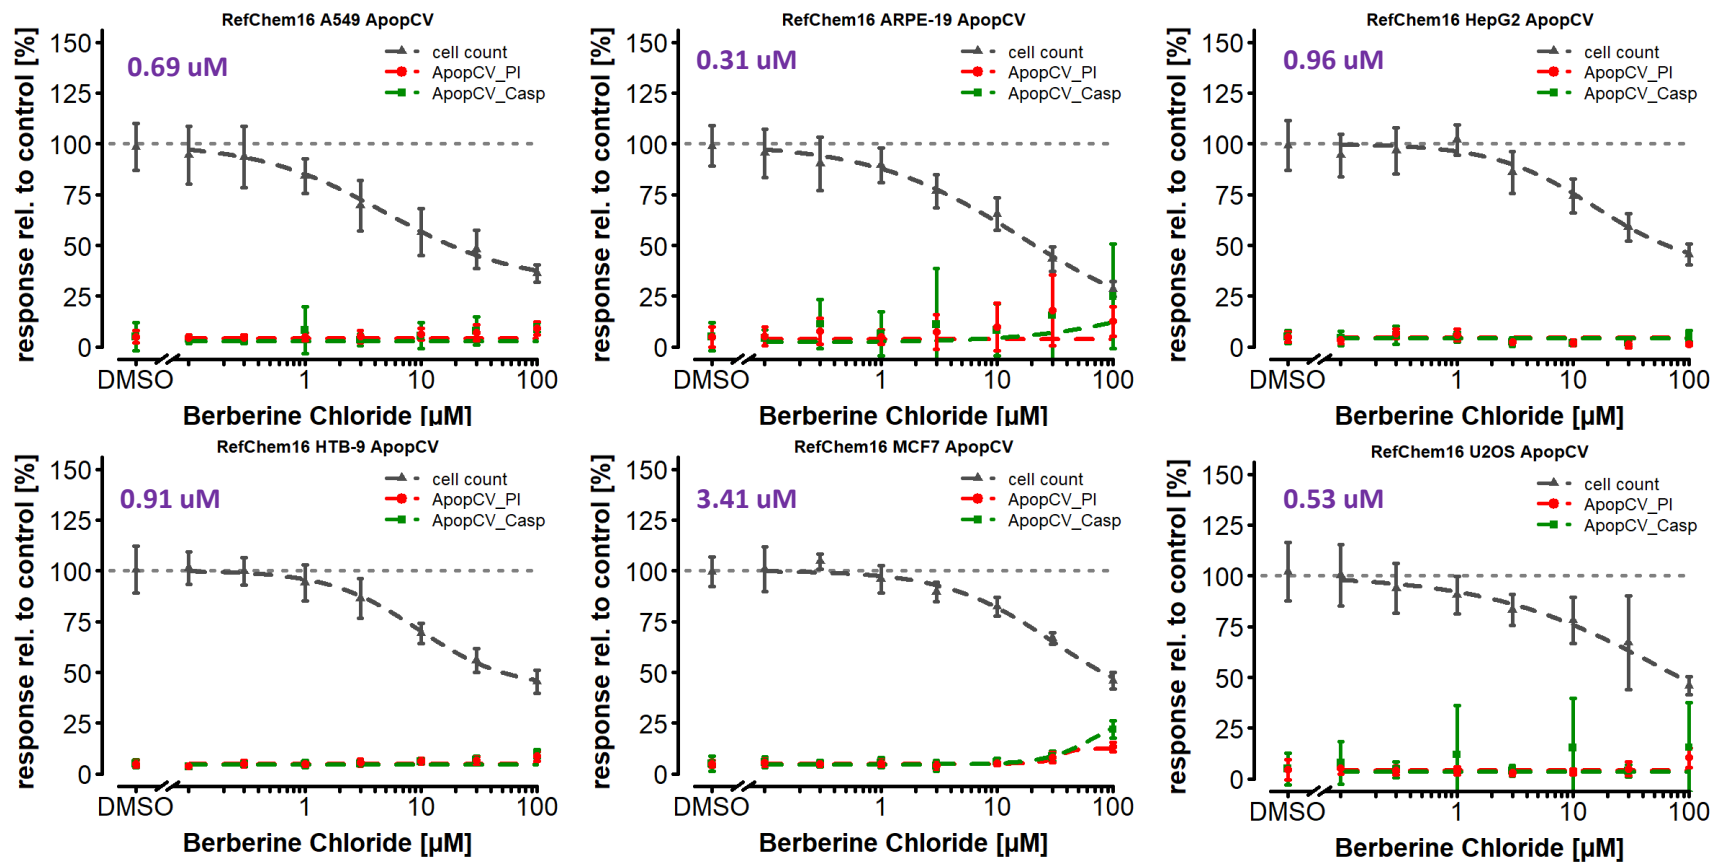

Supplement: NIHMS1689277-supplement-Supplement1.pdf [file NIHMS1689277-supplement-Supplement1.pdf]
